# Supplementary material for: Brain change trajectories in healthy adults correlate with Alzheimer’s related genetic variation and memory decline across life
Source: PubMed Central journal article supplement — Nat Commun. 2024 Dec 17;15:10651. doi: 10.1038/s41467-024-53548-z (PMC11652687; doi:10.1038/s41467-024-53548-z), 2024-12-17
Supplement: 41467_2024_53548_MOESM1_ESM.pdf [file 41467_2024_53548_MOESM1_ESM.pdf]

# Brain change trajectories in healthy adults correlate with Alzheimer's related genetic variation and memory decline across life

Roe et al.

## SUPPLEMENTARY INFORMATION

|                                    |       |
|------------------------------------|-------|
| Supplementary Figures 1-19.....    | 1-19  |
| Supplementary Tables 1-8.....      | 20-22 |
| Supplementary Note 1.....          | 23-24 |
| Supplementary Note 2.....          | 25    |
| References & Acknowledgements..... | 25    |

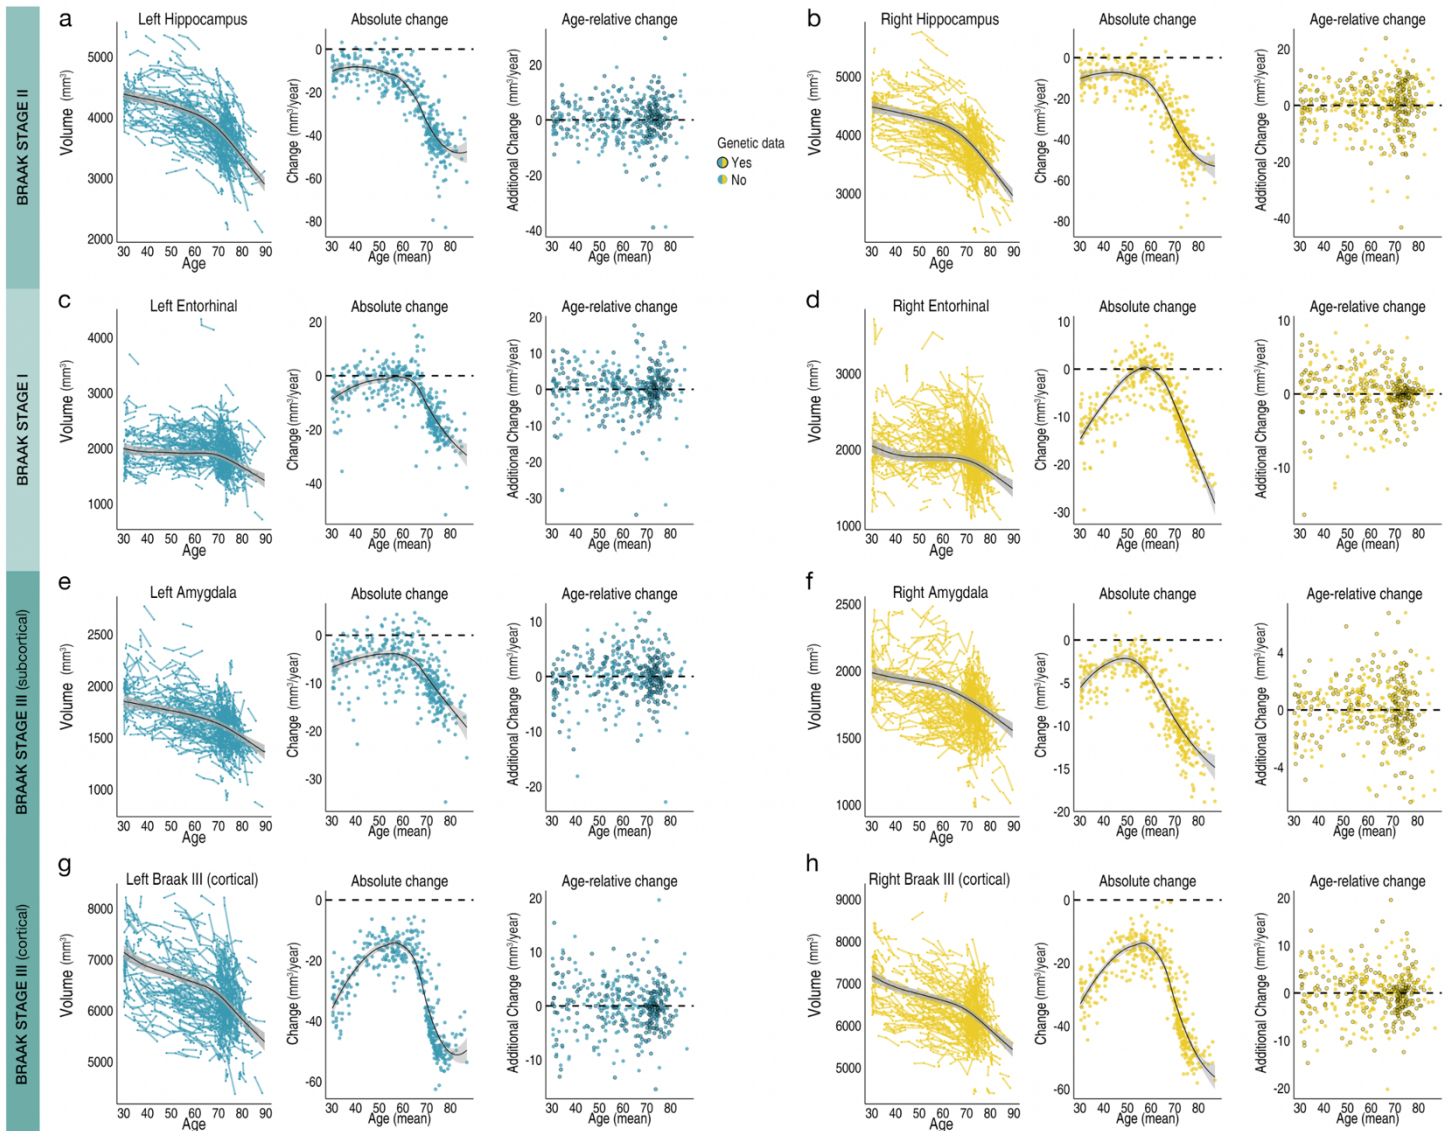

### SUPPLEMENTARY FIGURE 1

**Adult lifespan trajectories in early Braak regions.** Exclusively longitudinal data was used to estimate individual-specific age-relative change in bilateral hippocampus (Braak stage II; **a** left, **b** right), entorhinal cortex (Braak stage I; **c,d**), amygdala (Braak stage III subcortical; **e,f**), and a Braak Stage III cortical region (**g,h**), modelling the adult lifespan trajectories using GAMMs with random individual-specific slopes. Leftmost plots in each: adult lifespan trajectory from 30-89 years (data corrected for sex and scanner, lines connect longitudinal observations). Middle plots: absolute change per individual (datapoints) as a function of their mean age across timepoints. Rightmost plots: estimated age-relative change per individual (i.e. individual-specific slopes) as a function of their mean age across timepoints. Black stroke indicates whether or not genetic data was available per participant and thus whether the datapoint was included in the PRS-AD association tests. Trajectories depict mean measures and error bands depict 95% CI.

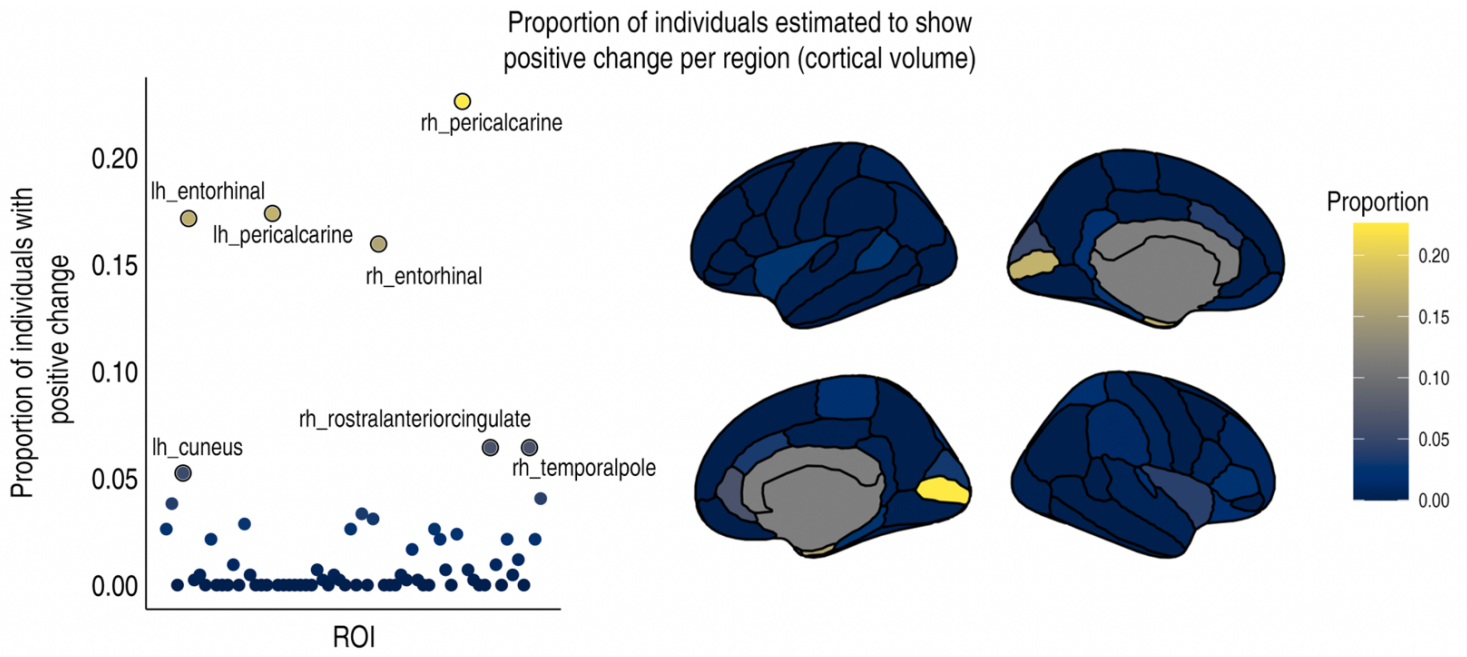

**SUPPLEMENTARY FIGURE 2**

**Assessment of brain change estimates.** We estimated the proportion of individuals estimated to show positive absolute change in cortical volume (i.e., growth) across the cortex. The median proportion of individuals estimated to show growth across cortical regions was 0.002. Left and right entorhinal cortex were clear outliers, suggesting these measures may be less reliable. Cortical volume change was estimated using the adult lifespan discovery sample (1430 scans from 420 individuals aged 30 to 89 years).

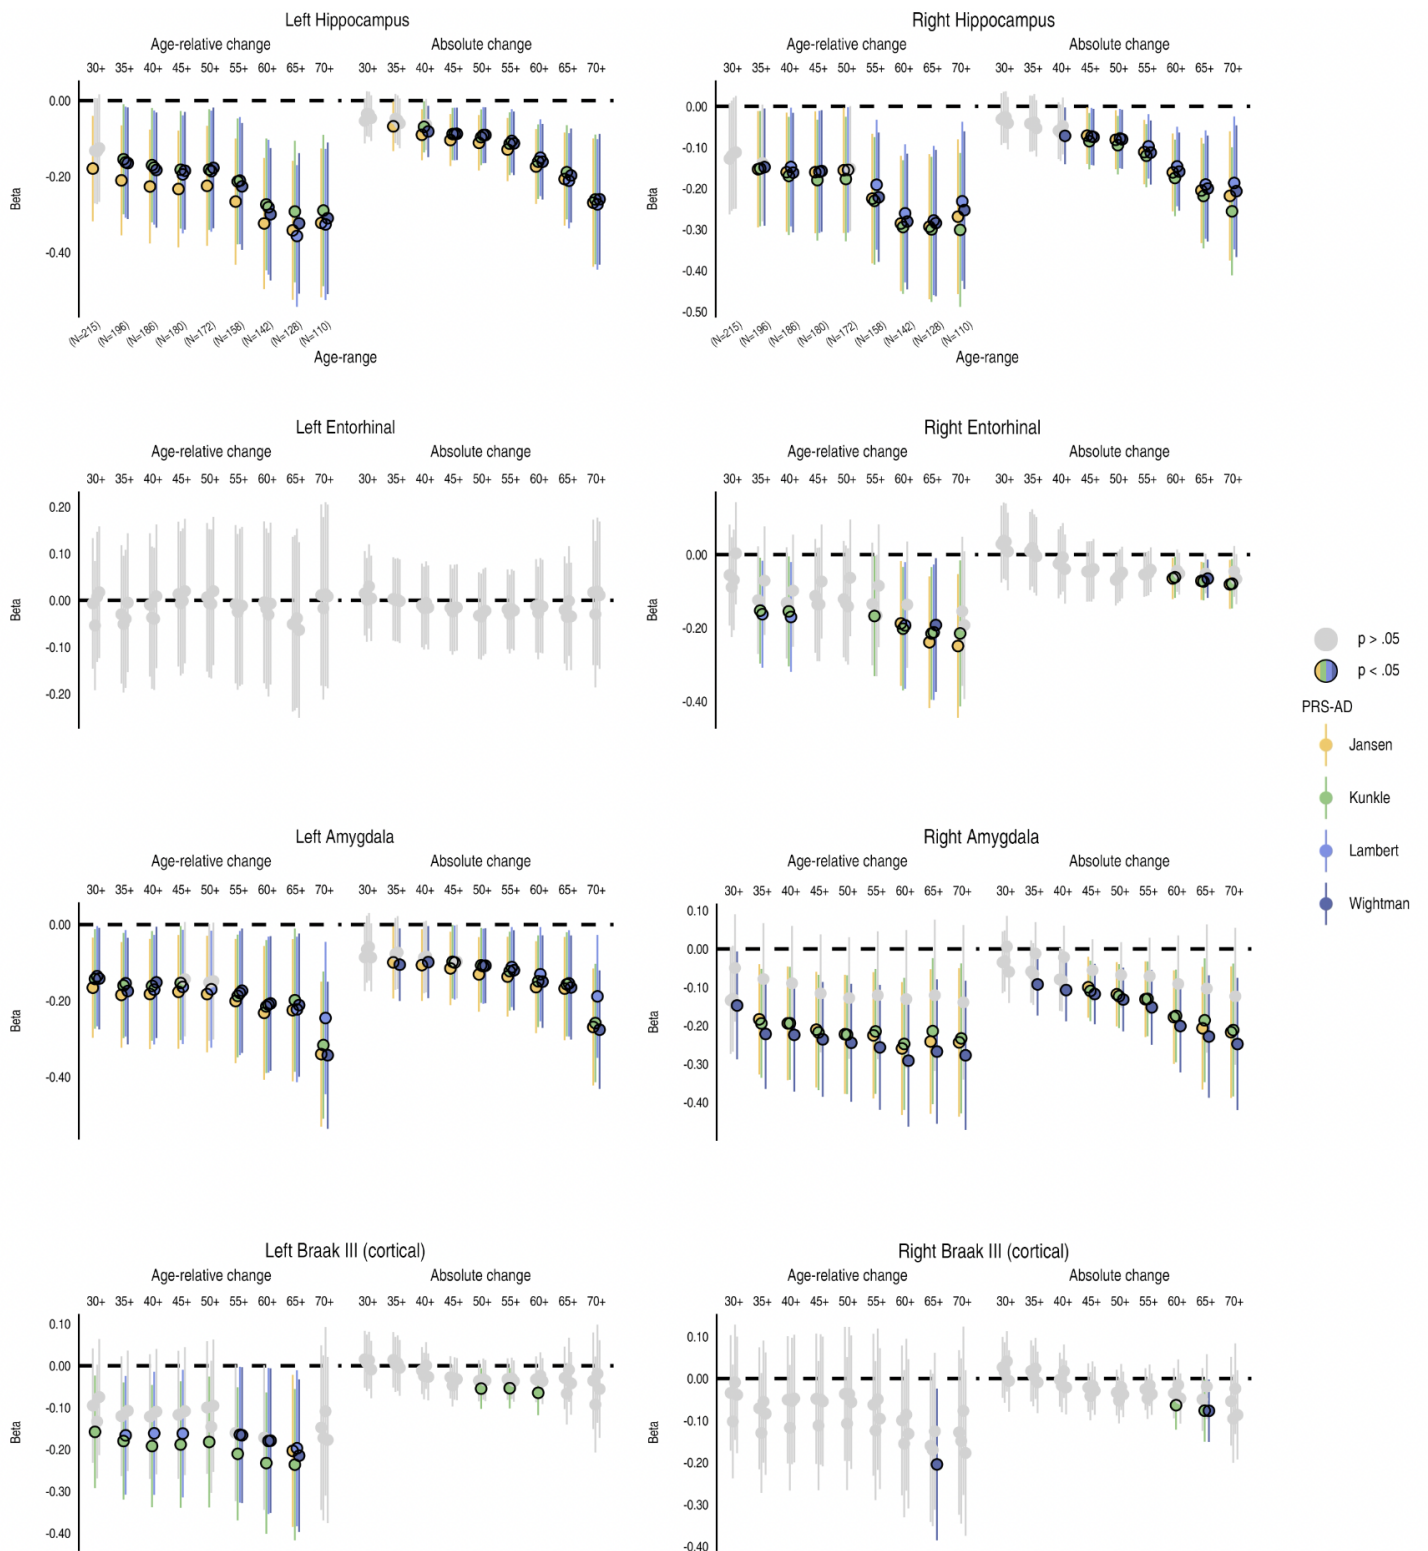

### SUPPLEMENTARY FIGURE 3

**Sensitivity analysis: quality control.** Univariate associations after discarding data from subjects with observations  $>3SD$  in any of the 8 a priori ROIs (maximum genetic  $N = 215$ ; exact sample size per age-range subset is shown in top row). The set of 576 PRS-AD beta estimates correlated at  $r = .95$  with the results reported in the main paper (See Figures 1-2). Error bars depict 95% CI.

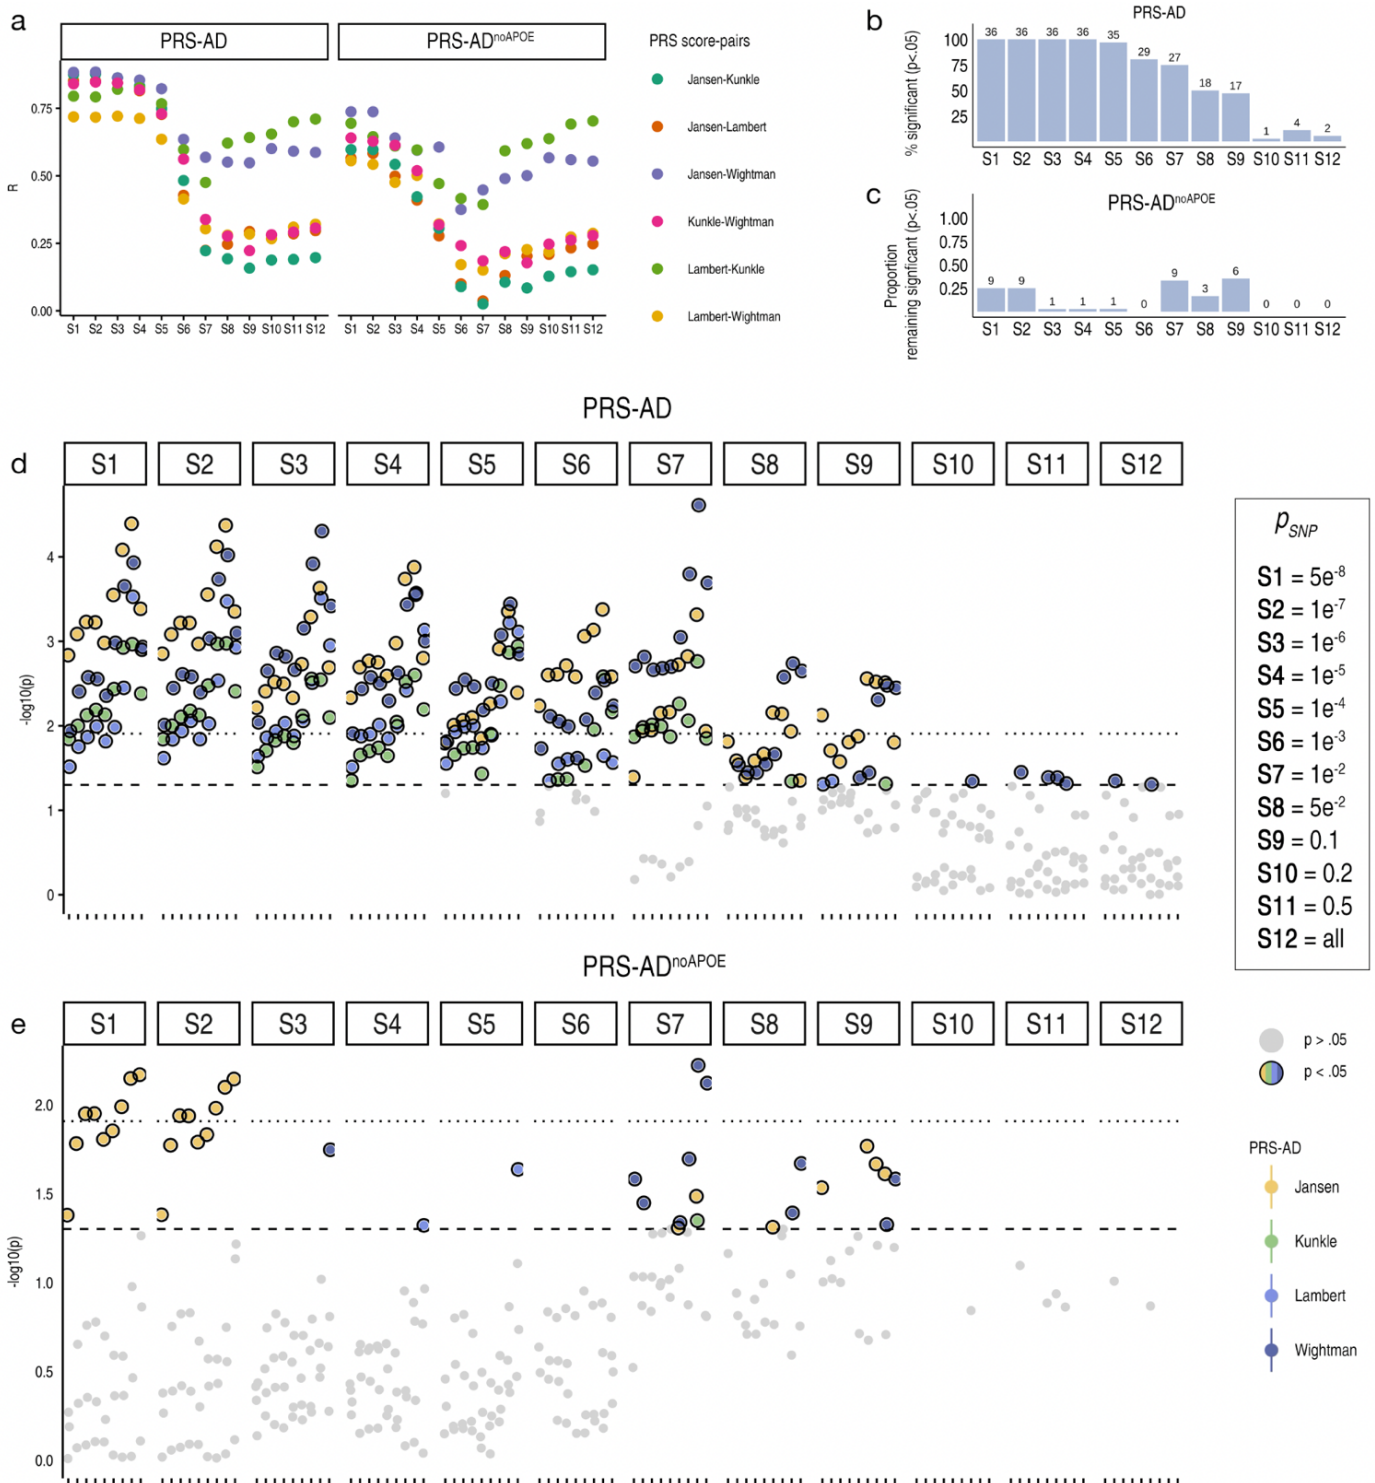

#### SUPPLEMENTARY FIGURE 4

**Sensitivity analysis: 12 alternative PRS-AD thresholds.** **a** The correlation between PRS-AD scores dropped when including more SNPs in the PRS, rendering the results between scores less comparable at more liberal thresholds. **b** The percentage count (y-axis) of significant PRS-AD associations with age-relative change in left hippocampus for different PRS computation thresholds ( $p < .05$  [uncorrected]; 9 age-subsets x 4 scores). **c** Where the PRS-AD association was significant ( $p < .05$  [uncorrected]) we tested whether it remained significant with PRS-AD<sup>noAPOE</sup> ( $p < .05$  [uncorrected]). The plot illustrates the proportion of PRS-AD associations in b that remained significant with PRS-AD<sup>noAPOE</sup> and their counts. **d-e** The associations visualized (9 age-subsets on dashed x-axis). The first column depicts the p-values using genome-wide significant SNPs as in the main paper. Coloured points/black outline depicts associations at  $p < .05$  (uncorrected). As these post-hoc tests are for illustrative purposes and not independent of our initial main analysis, the

FDR-correction level applied is the same as across the 576 PRS-AD tests in the main paper. Dashed and dotted horizontal lines depict uncorrected and corrected significance levels.

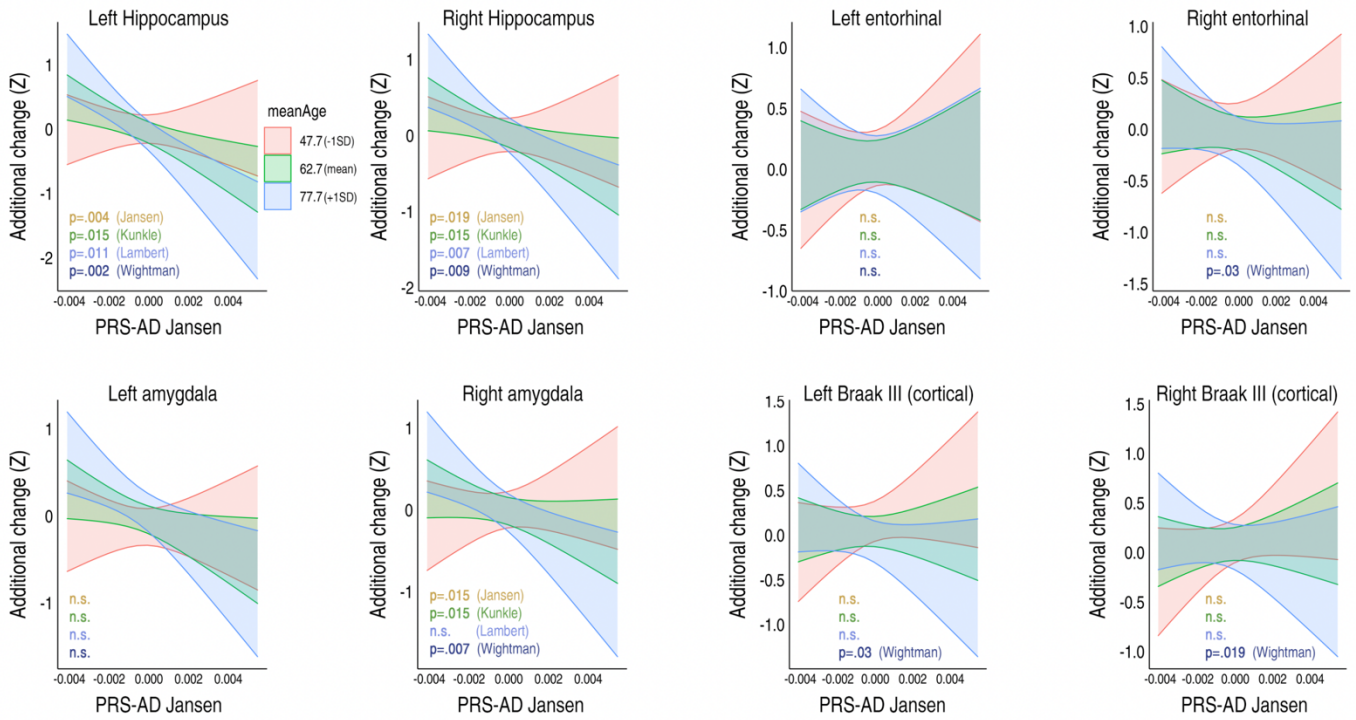

**SUPPLEMENTARY FIGURE 5**

**PRS-AD x mean age interactions.** Results from alternative analyses dependent on power across the full age-range (30-89 years). Linear PRS-AD \* mean age interactions upon age-relative change that were significant at  $p < .05$  (uncorrected) are in bold. None of the tests survived FDR-correction across the 32 tests performed in this analysis (see [Supplementary Table 6](#)). Error bands depict 95% CI.

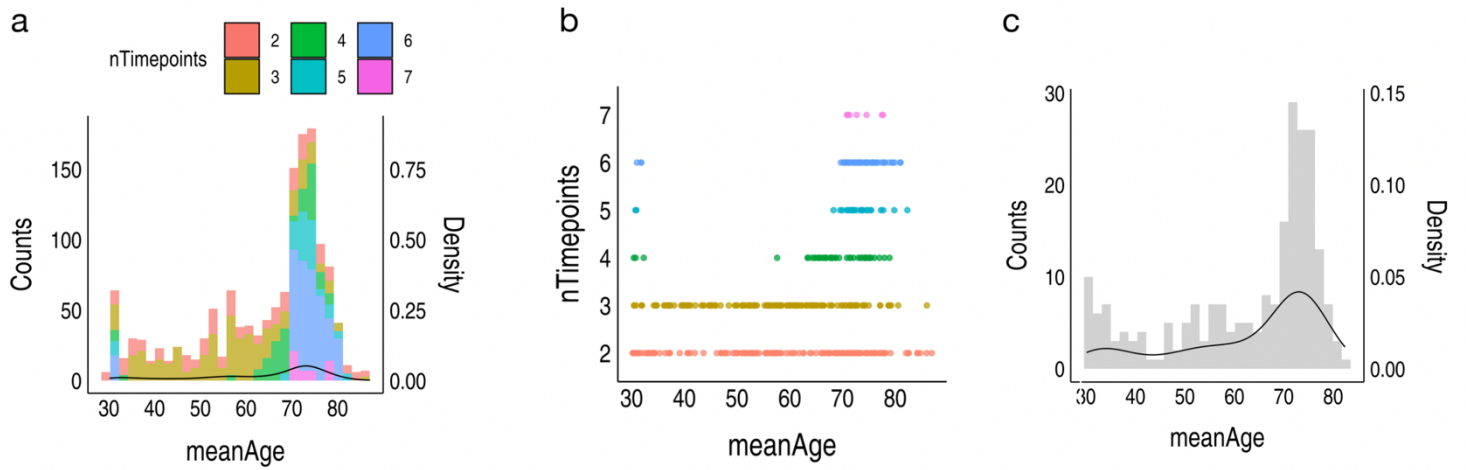

**SUPPLEMENTARY FIGURE 6**

**Age and timepoint distributions.** **a** Age and **b** timepoint distribution of the LCBC discovery cohort used to estimate individual-specific brain change (obs = 1430; N = 420). **c** Age distribution of the genetic observations in this sample (N = 229).

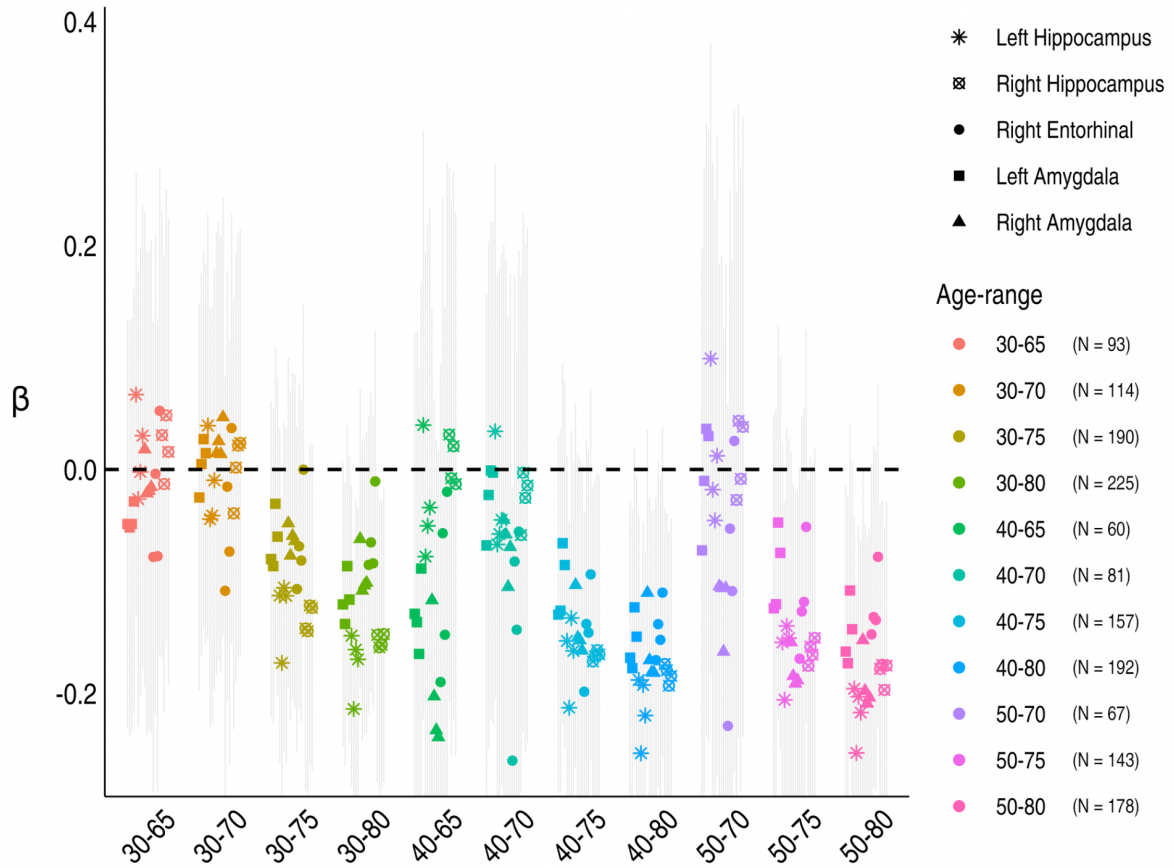

**SUPPLEMENTARY FIGURE 7**

Beta estimates for linear PRS-AD associations with age-relative change in early Braak stage regions, tested across alternative age subsets discarding the data from the oldest individuals. Estimates are shown for Braak regions where PRS-AD was associated with change in the main analyses. All analyses were corrected for mean age, sex, N timepoints, interval between first and last timepoint, and 10 genetic PCs. Error bars depict 95% CI. The data indicated the genetic associations were not driven by only the oldest-old, though older adults likely contributed more of the individual differences in brain change signal. Error bars depict 95% CI.

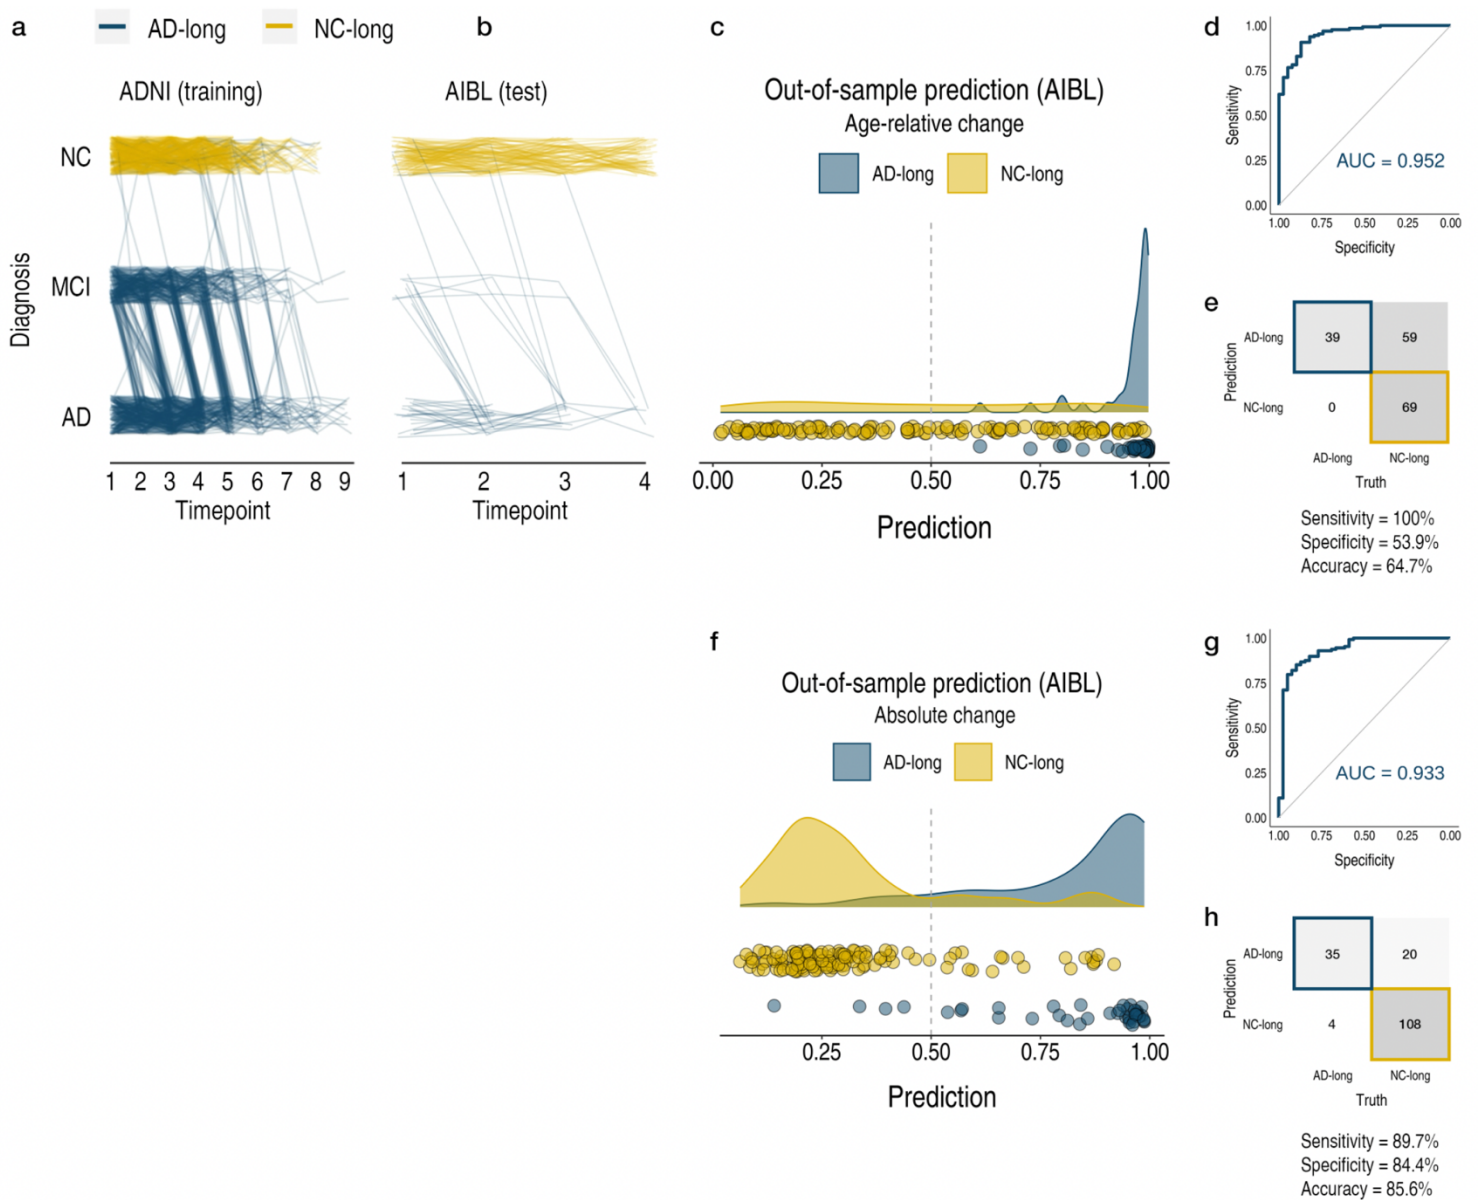

**SUPPLEMENTARY FIGURE 8**

**Longitudinal ADNI training and AIBL test data.** **a** Longitudinal grouping in ADNI training data (as in Fig. 3A) **b** Longitudinal grouping in the independent AIBL test data. **c-e** Out-of-sample prediction (AIBL) for the binary classifier based on age-relative change, including receiver operator curve (d), confusion matrix and performance metrics (e). **f-h** Out-of-sample results for an alternative binary classifier based on absolute change for comparison.



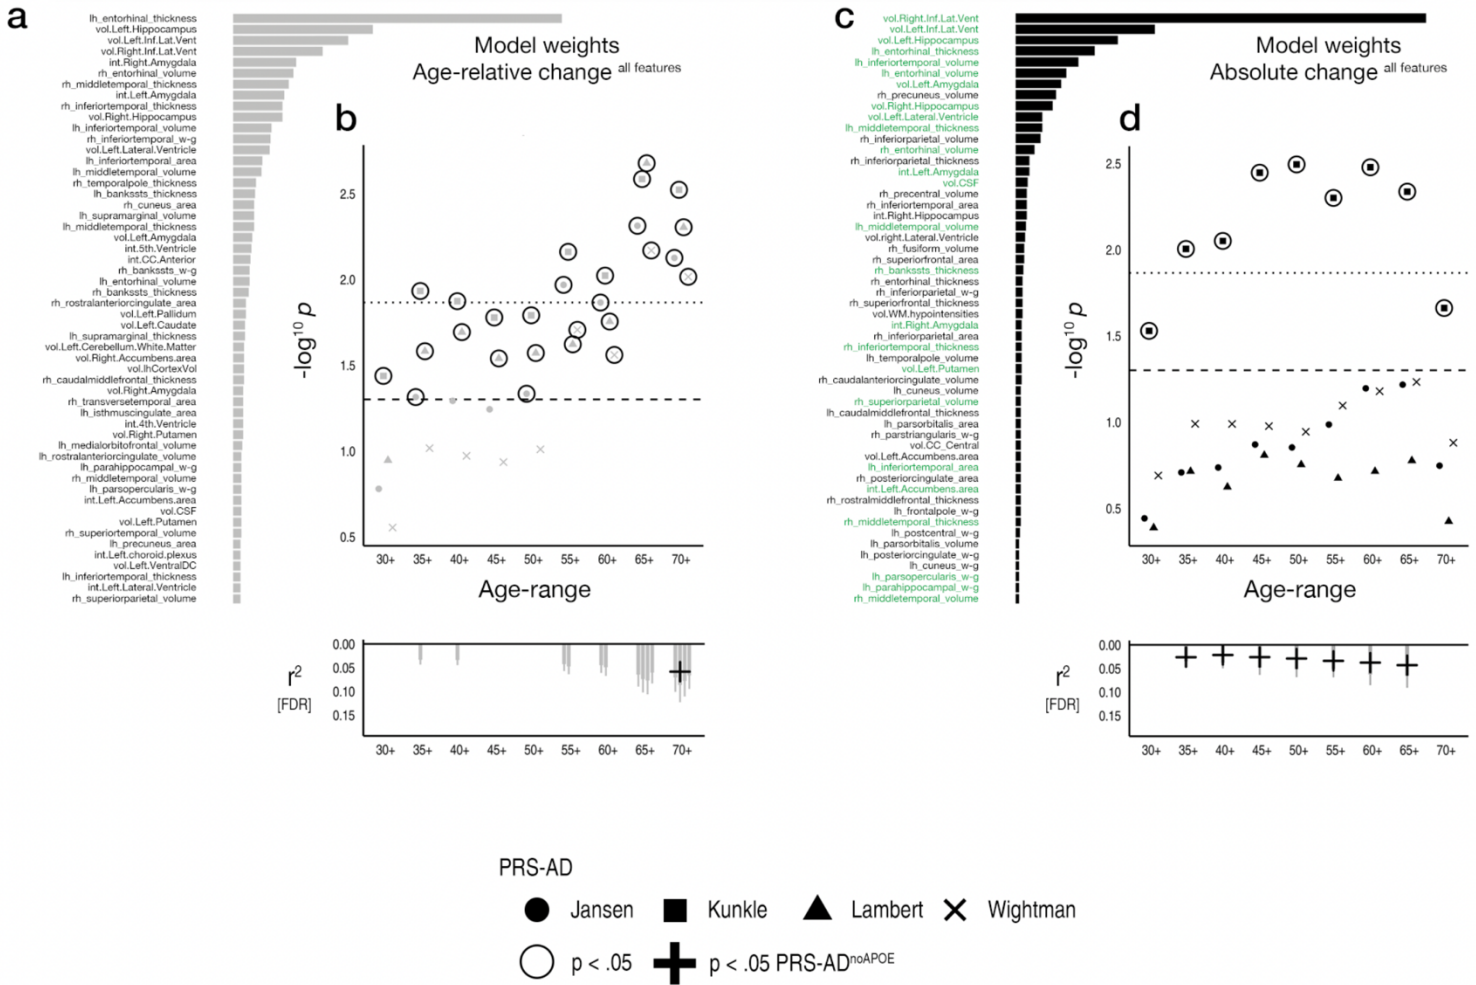

**SUPPLEMENTARY FIGURE 9**

**ADNI-derived ML models applied to the healthy adult lifespan.** **a** Top features for classifying *AD-long* from *NC-long* individuals in ADNI data based on age-relative change (as in Fig. 4A). We directly applied the ADNI-derived model weights to the LCBC healthy adult lifespan dataset. **b** PRS-AD associations in the LCBC healthy adult lifespan dataset after predicting with the learned model weights from the ADNI-derived model (i.e. LCBC as test data). The dependent variable is the model-implied log odds of having AD ( $\text{probAD}^{\text{relChange}}$ ). Datapoints show  $(-\log_{10})$  p-values for PRS-AD associations with  $\text{probAD}^{\text{relChange}}$ , tested at progressively older age-ranges, for all four scores. Dashed line indicates  $p = .05$ , and datapoints with black stroke depict significant PRS-AD associations at  $p < .05$ . Datapoints above the dotted line are significant at  $p(FDR) < .05$  (FDR-correction applied across all 72 PRS-AD tests in this analysis). Bottom plot shows partial  $r^2$  for PRS-AD where the association survived FDR-correction. Where FDR-corrected significant, we retested the association after removing *APOE* (PRS-AD<sup>noAPOE</sup>). Partial  $r^2$  of PRS-AD<sup>noAPOE</sup> is depicted by a black cross if the association remained significant ( $p < .05$ ). **c** Top features for classifying *NC-long* from *AD-long* individuals in ADNI data based on absolute change. Green text indicates whether the feature was present or not in the list of top features from the model shown in a. **d** PRS-AD associations in the LCBC dataset after predicting with ADNI-derived model weights based on absolute change. Here, the dependent variable is the model-implied log odds of having AD ( $\text{probAD}^{\text{absChange}}$ ). Bottom plot shows partial  $r^2$  for PRS-AD where the association survived FDR-correction, and partial  $r^2$  of PRS-AD<sup>noAPOE</sup> is depicted by a black cross if the association remained significant after removing *APOE* ( $p < .05$ ). Error bars depict 95% CI. lh=left hemisphere, rh=right hemisphere, vol=volume (subcortical); int=intensity (subcortical); w-g=grey/white matter contrast. Subcortical features (aseg atlas) are delineated with “.”, whereas cortical features (aparc atlas) are delineated with “\_”. Error bars depict 95% CI.

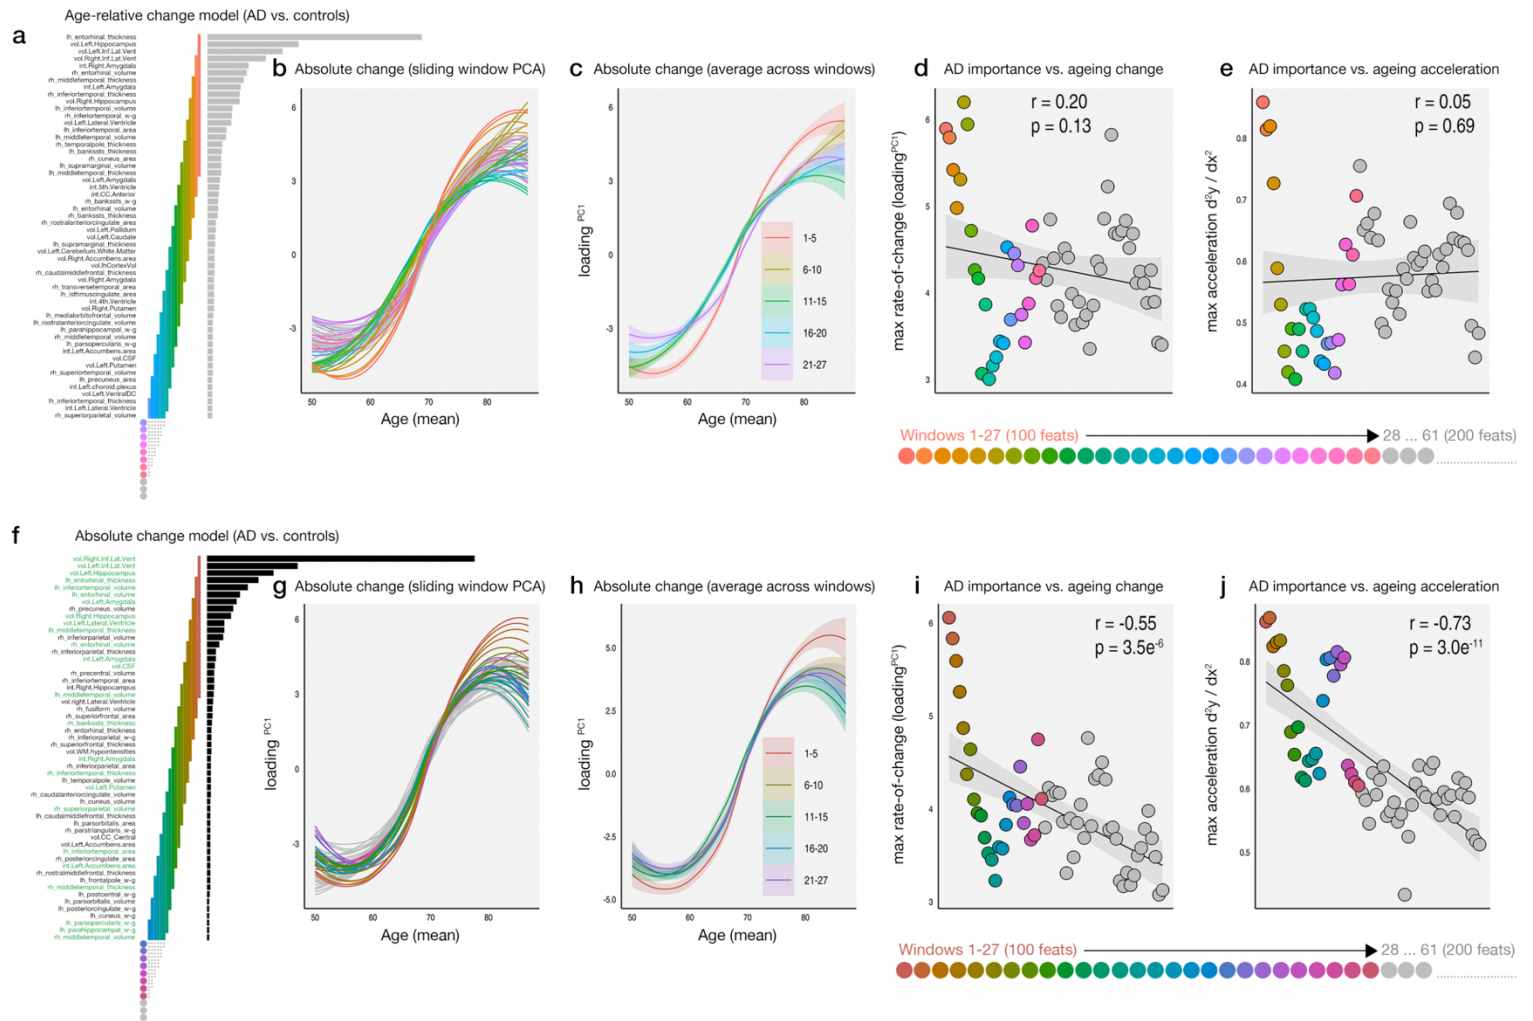

### SUPPLEMENTARY FIGURE 10

**PCA-based sliding window trajectory analysis.** Within the 50-89 years age-range, we ran a sliding window PCA, iteratively calculating PC1 across 20 features with a step size of 3. We calculated the trajectory of absolute change within each window. Colours depict the selection of features across which we calculated PC1 (here including hippocampal and amygdala volumes) and link with the subsequent plots. Feature selections and colours high up in the importance matrix thus represent features that contribute most to separating AD patients from controls (i.e., AD importance), whereas selections that are comparatively lower down contribute less to this prediction. **a** Top features for classifying *AD-long* from *NC-long* individuals in ADNI data based on age-relative change (as in Fig. 4A). **b** Absolute change as a function of mean age (across timepoints) within each window. Since the y-axis in b, c, g and h represents change, the slope of the curves represents acceleration. Feature selections across the top 100 features are shown in colour (27 windows), whereas trajectories in grey represent feature selections beyond the first 100 features (up to 200 features; 61 windows). Features most important for separating AD patients from controls showed the highest rate-of-change and steepest acceleration in healthy individuals. **c** As in b, except the trajectories are averaged across the feature windows depicted in the key to better show their differences. Ribbons depict 95% CI. **d** Maximum rate-of-change and **e** acceleration of the brain aging trajectories in healthy individuals, plotted against AD-importance (x-axis shows the feature selections and thus implicitly represents AD-importance). Note that the plots confirm that maximal rate-of-change and acceleration in healthy individuals is found in brain features that are most important for separating AD patients from controls. **f-j** As in a-e, except feature selections follow the order of importance of features for classifying *AD-long* from *NC-long* individuals based on absolute change (i.e. as in Supplementary Fig. 9C). Again, maximal rate-of-change and acceleration in healthy individuals was found in brain features that are most important for separating AD patients from controls. Error bands depict 95% CI.

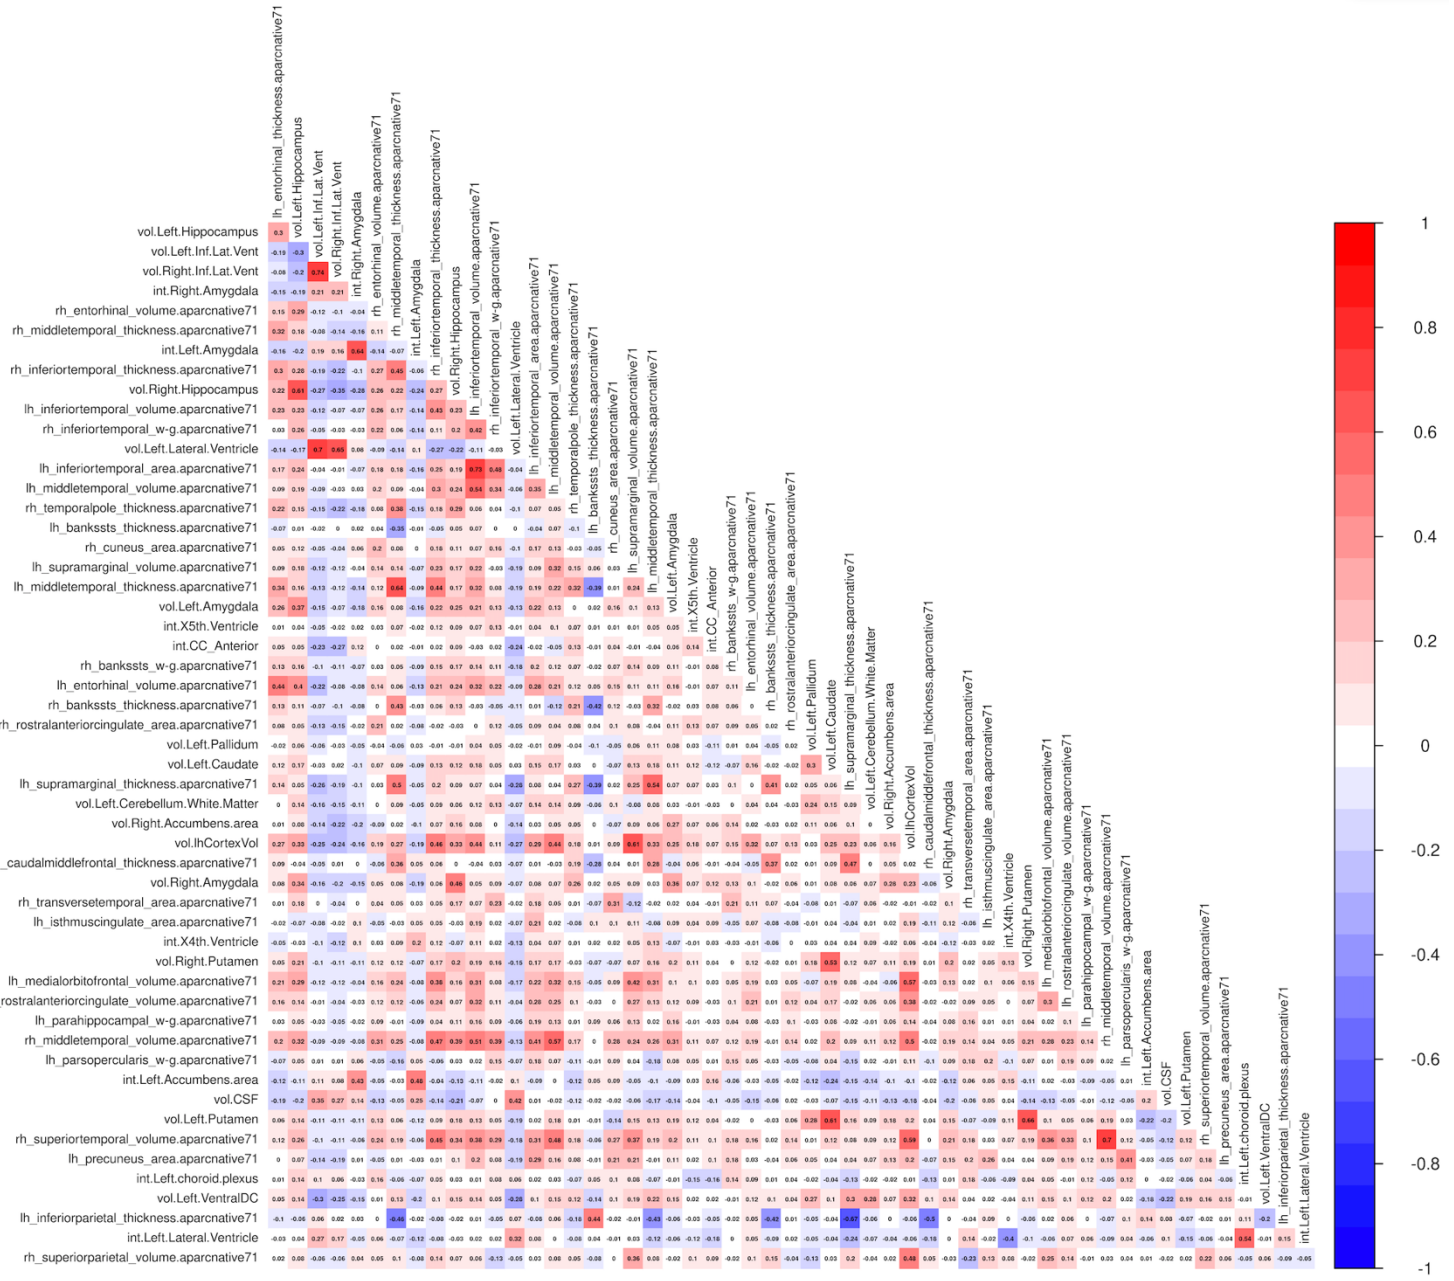

**SUPPLEMENTARY FIGURE 11**

**Correlations between age-relative change estimates in the top 54 AD-accelerated features in LCBC data.**

Correlations are shown for the age-range 50-89 years. 54 features are shown due to the inclusion of hippocampal and amygdala volumes not otherwise included in PC1<sup>relChange</sup>.

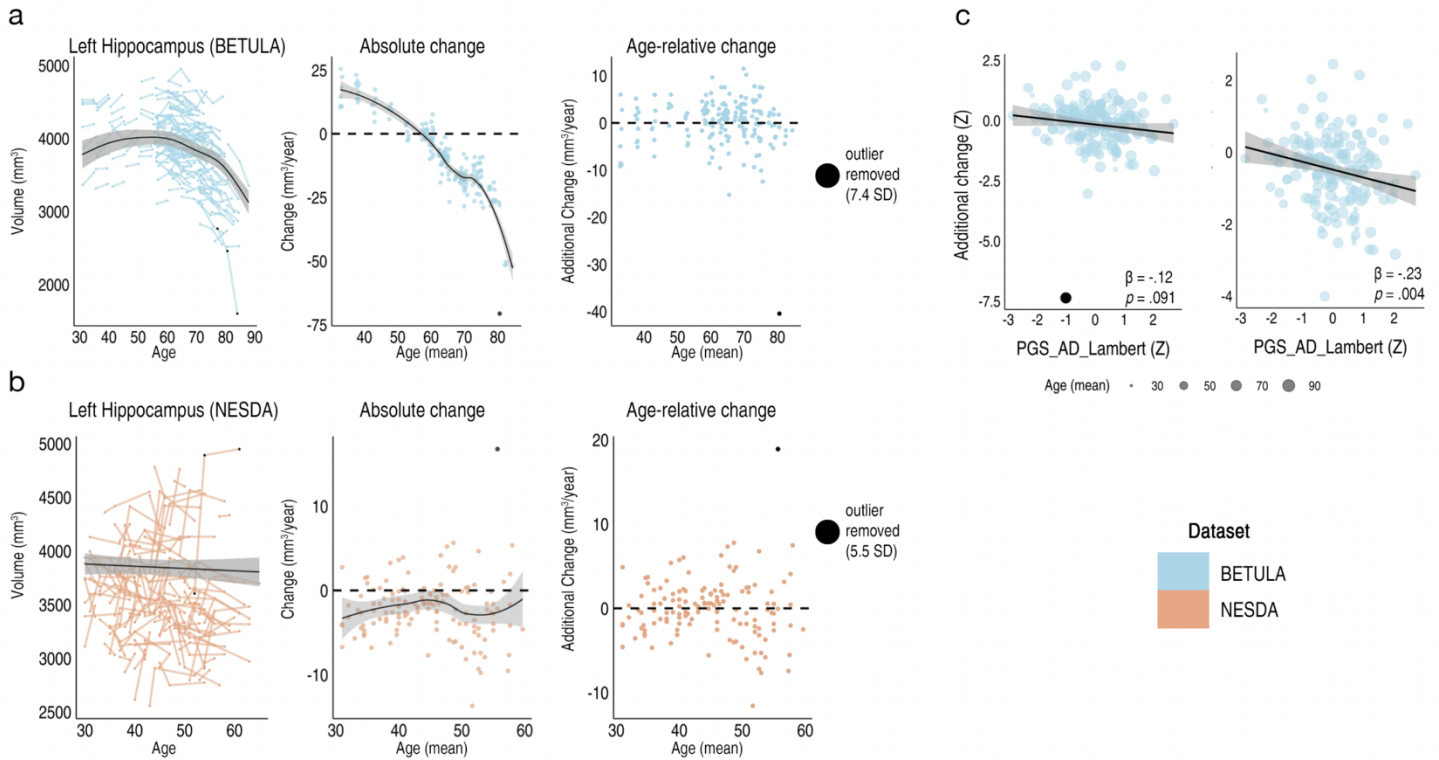

### SUPPLEMENTARY FIGURE 12

Initial GAMM trajectory analysis separately in the BETULA and NESDA longitudinal replication samples (max 3 timepoints) revealed a strong outlier in the left hippocampal slope data in each sample (datapoint in black indicates the large negative outlier in BETULA data [7.4 SD; top row], and the large positive outlier in NESDA data [5.5 SD; bottom row]). **a-b** These outliers are shown for each of their timepoints (leftmost plots), and absolute (middle plots) and age-relative change estimates (rightmost plots). **c** In BETULA, the strong outlier had a large influence on the tested PRS-AD association with age-relative change, shown before ( $\beta = -.12$ ,  $p = .091$ ; left plot) and after removal of this outlier ( $\beta = -.23$ ;  $p = .004$ ; right plot; one example score). The two samples were then collated into a single replication dataset and these outliers were removed. Error bands depict 95% CI.

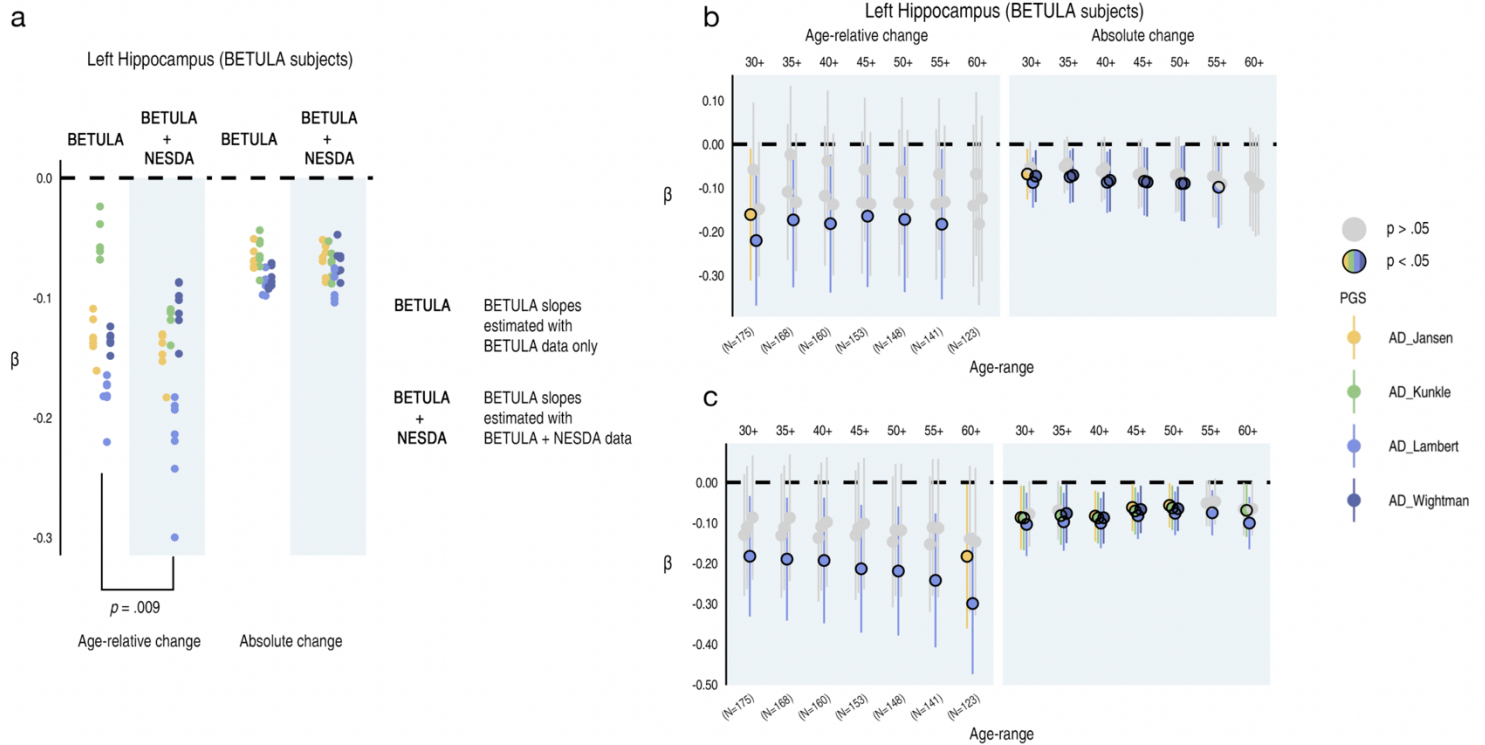

### SUPPLEMENTARY FIGURE 13

**a** In the same 175 individuals in BETULA, PRS-AD beta estimates with age-relative change in left hippocampus were significantly lower ( $p = .009$  [one-sided]) when their individual-specific slopes were estimated together with NESDA data, relative to when estimated using only BETULA data. **b** Beta estimates for individual-specific slopes (BETULA subjects) estimated from a GAMM using only BETULA data. **c** Beta estimates for individual-specific slopes (same 175 subjects) estimated from a GAMM across BETULA and NESDA data. Including more longitudinal observations in the GAMM helped optimize the estimation of individual-specific slopes, boosting the power to detect PRS-AD associations in the same individuals. Error bars depict 95% CI.

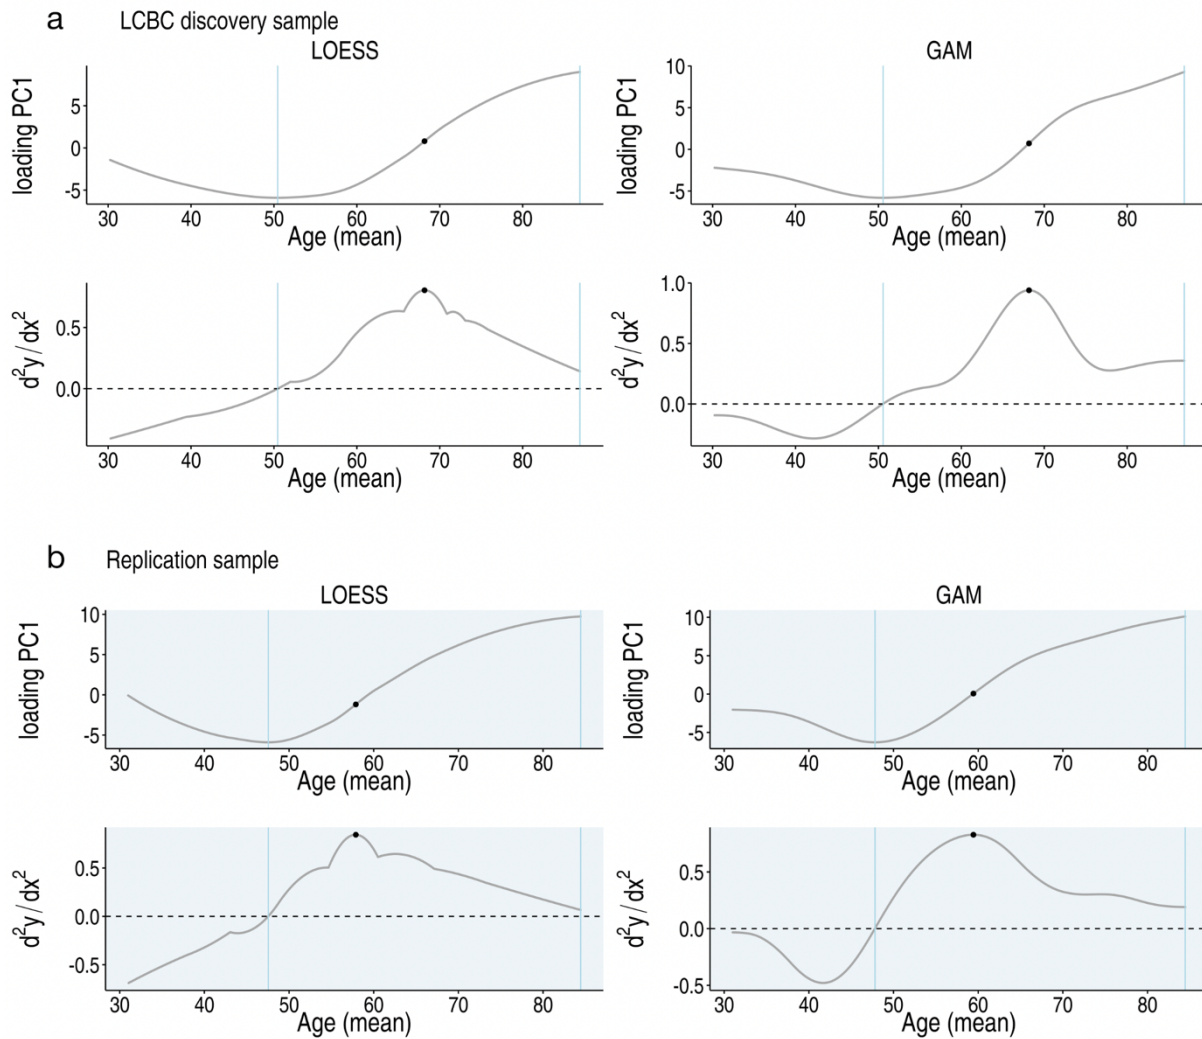

#### SUPPLEMENTARY FIGURE 14

##### Multivariate change in AD features ( $PC1^{absChange}$ ) in healthy adults

**a** For the LCBC adult lifespan discovery sample, top row shows the rate of absolute change ( $PC1^{absChange}$ ) which reflects the first derivative (i.e., the y-axis represents rate-of-change; see Methods). Bottom row shows the derivative of this curve, which therefore represents acceleration (i.e., second derivative). Left column: estimated using a Locally Estimated Scatterplot Smoothing (LOESS) model (as in Fig. 4 and Fig. 5). Right column: estimated using a General Additive Model (GAM). The first and second blue line markers indicate the onset of negative change (crossing to positive on the second derivative) and the point of maximum rate-of-change in AD features in healthy adults. Black points indicate the point of maximum accelerated change. **b** As above, shown for the adult lifespan replication sample.

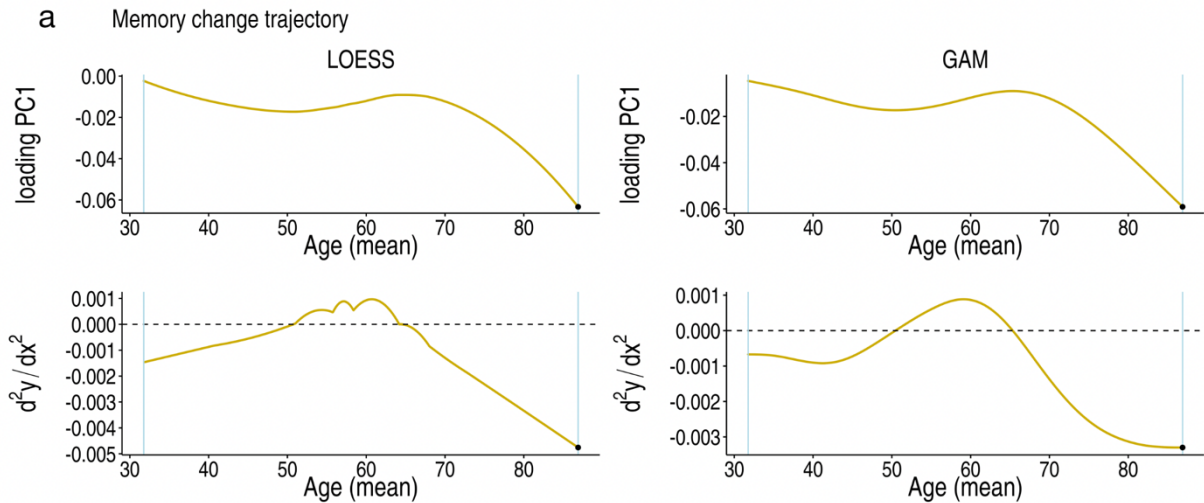

### SUPPLEMENTARY FIGURE 15

#### Memory change trajectory across the healthy adult lifespan

a Top row shows the rate of absolute memory change which reflects the first derivative (i.e., the y-axis represents rate of change; see Methods). Bottom row shows the derivative of this curve, which therefore represents acceleration (i.e., second derivative). Left column: estimated using a Locally Estimated Scatterplot Smoothing (LOESS) model (as in Fig. 6). Right column: estimated using a General Additive Model (GAM). The first and second blue line markers indicate the onset of negative memory change (estimated at the minimum mean age of our sample) and the point of maximum rate-of-change in memory in healthy adults (estimated at the maximum mean age of our sample). Black points indicate the point of maximum accelerated negative memory change.

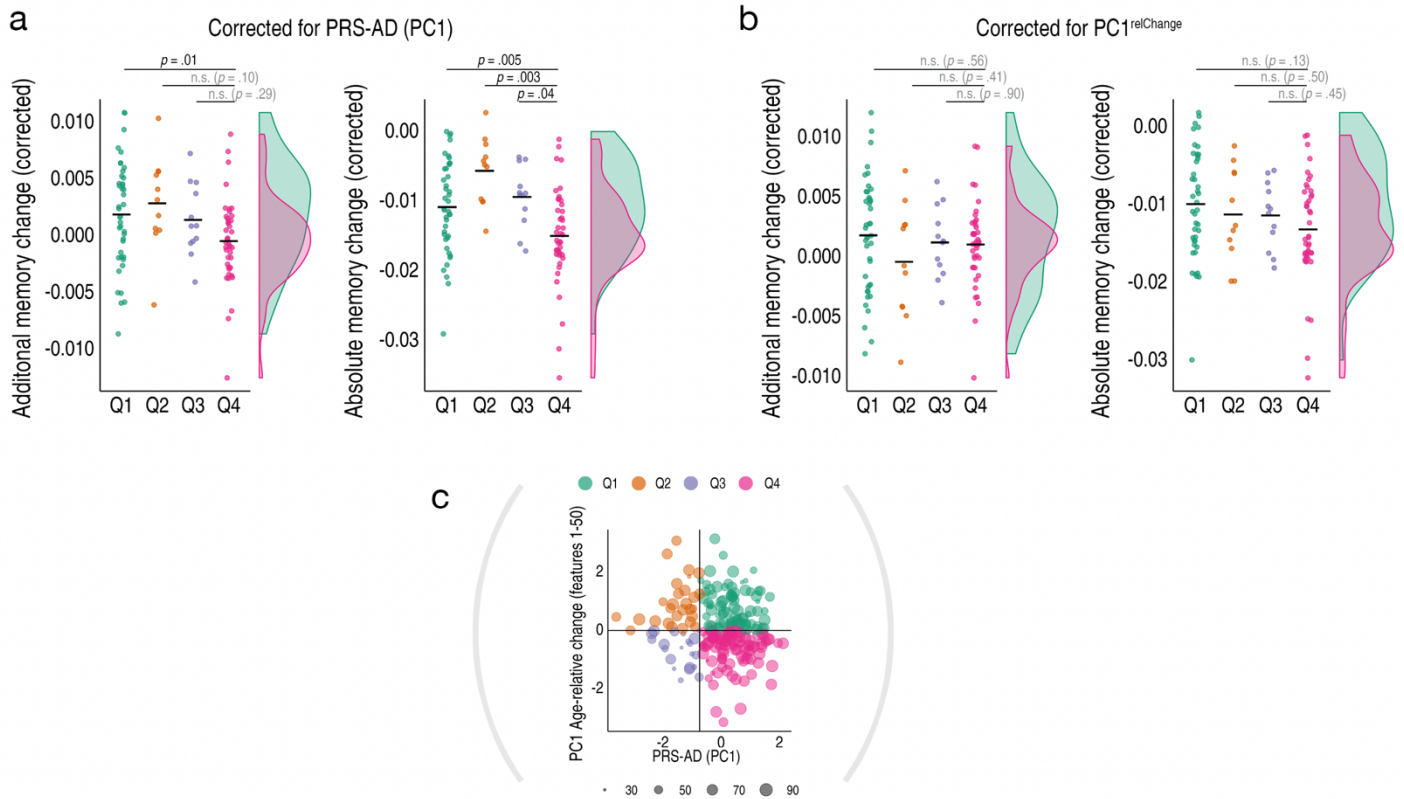

### SUPPLEMENTARY FIGURE 16

**Memory change results for alternative models correcting for additional covariates.** **a.** Correcting for group-differences in genetic risk (PRS-AD; PC1 across four scores), and **b.** group-differences in multivariate brain change across AD-accelerated features (PC1<sup>relChange</sup>). Group-differences in memory change persisted when controlling for differences in genetic risk but not when correcting for group-differences in brain change. Similar results were found correcting for the number of *APOE*- $\epsilon 4$  alleles. Other covariates: mean age, sex, number of timepoints, interval between first and last timepoint. **c.** Shown again for comparison, the association that was used to define four quadrant-groups representing the conjunction of brain and genetic risk factors (as in Fig. 4D; pink group depicts individuals high on both).



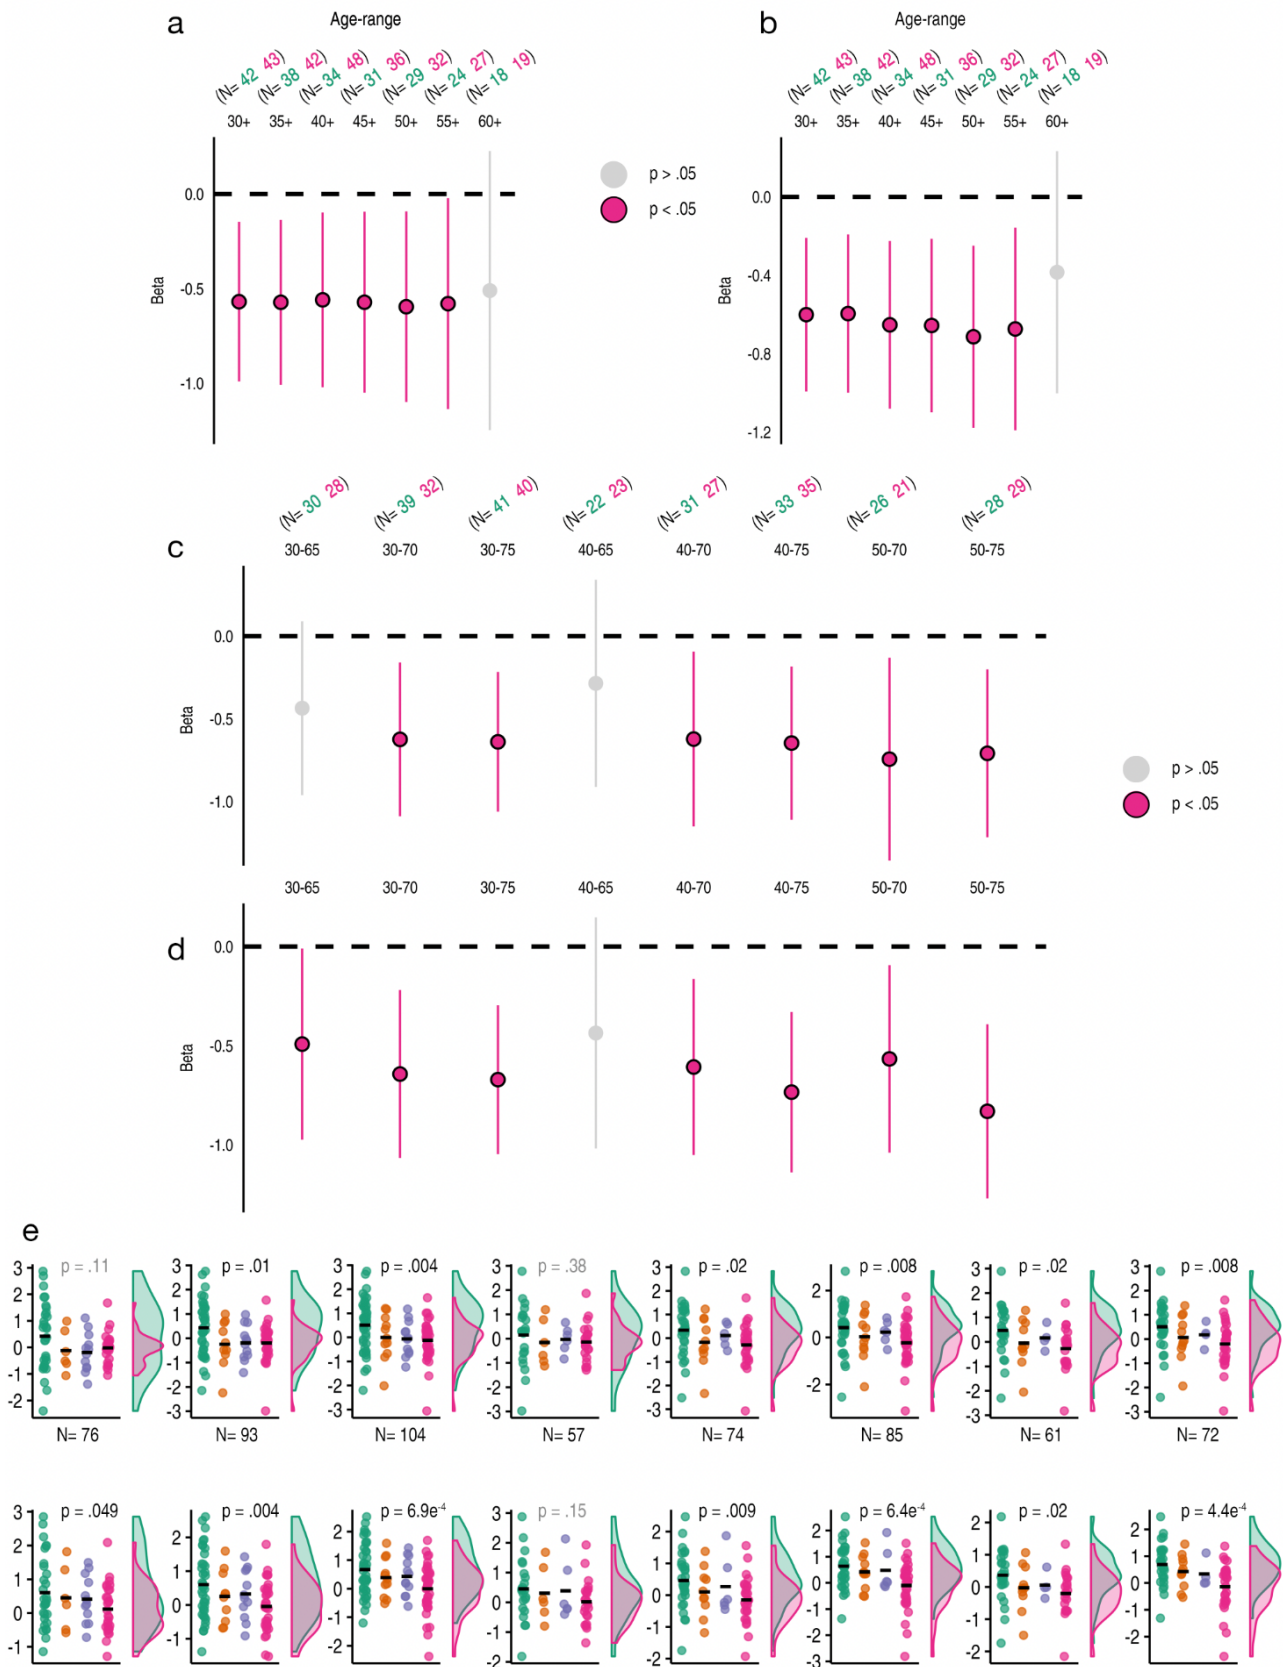

**SUPPLEMENTARY FIGURE 17**

**Memory change results for models across different age-ranges.** **a** Group-differences in age-relative and **b** absolute memory change tested at progressively older age-ranges (main model). **c** Group-differences in age-relative and **d** absolute memory change across alternative age subsets (redundant subsets removed; standardized betas, 95% CI error bars). Colour depicts significance at  $p < .05$  [uncorrected]. As these tests shed light on group-differences that survived FDR-correction in our main hypothesis-driven model, no further correction was applied. **e** The distribution of

group differences in age-relative (upper row) and absolute memory change (lower) within each age subset in C and D (Y axis shows Z values). The p-value of the group-difference is given above each plot. The reported group differences in memory change were not driven by the oldest adults but evident within the age-ranges 30-65 and 30-70 (all models and datapoints corrected for covariates: mean age, *APOE-ε4* carriership, sex, N timepoints, and interval between first and last timepoint). The N of the two groups wherein the difference was found (a-d) and N of the overall model is given (e).

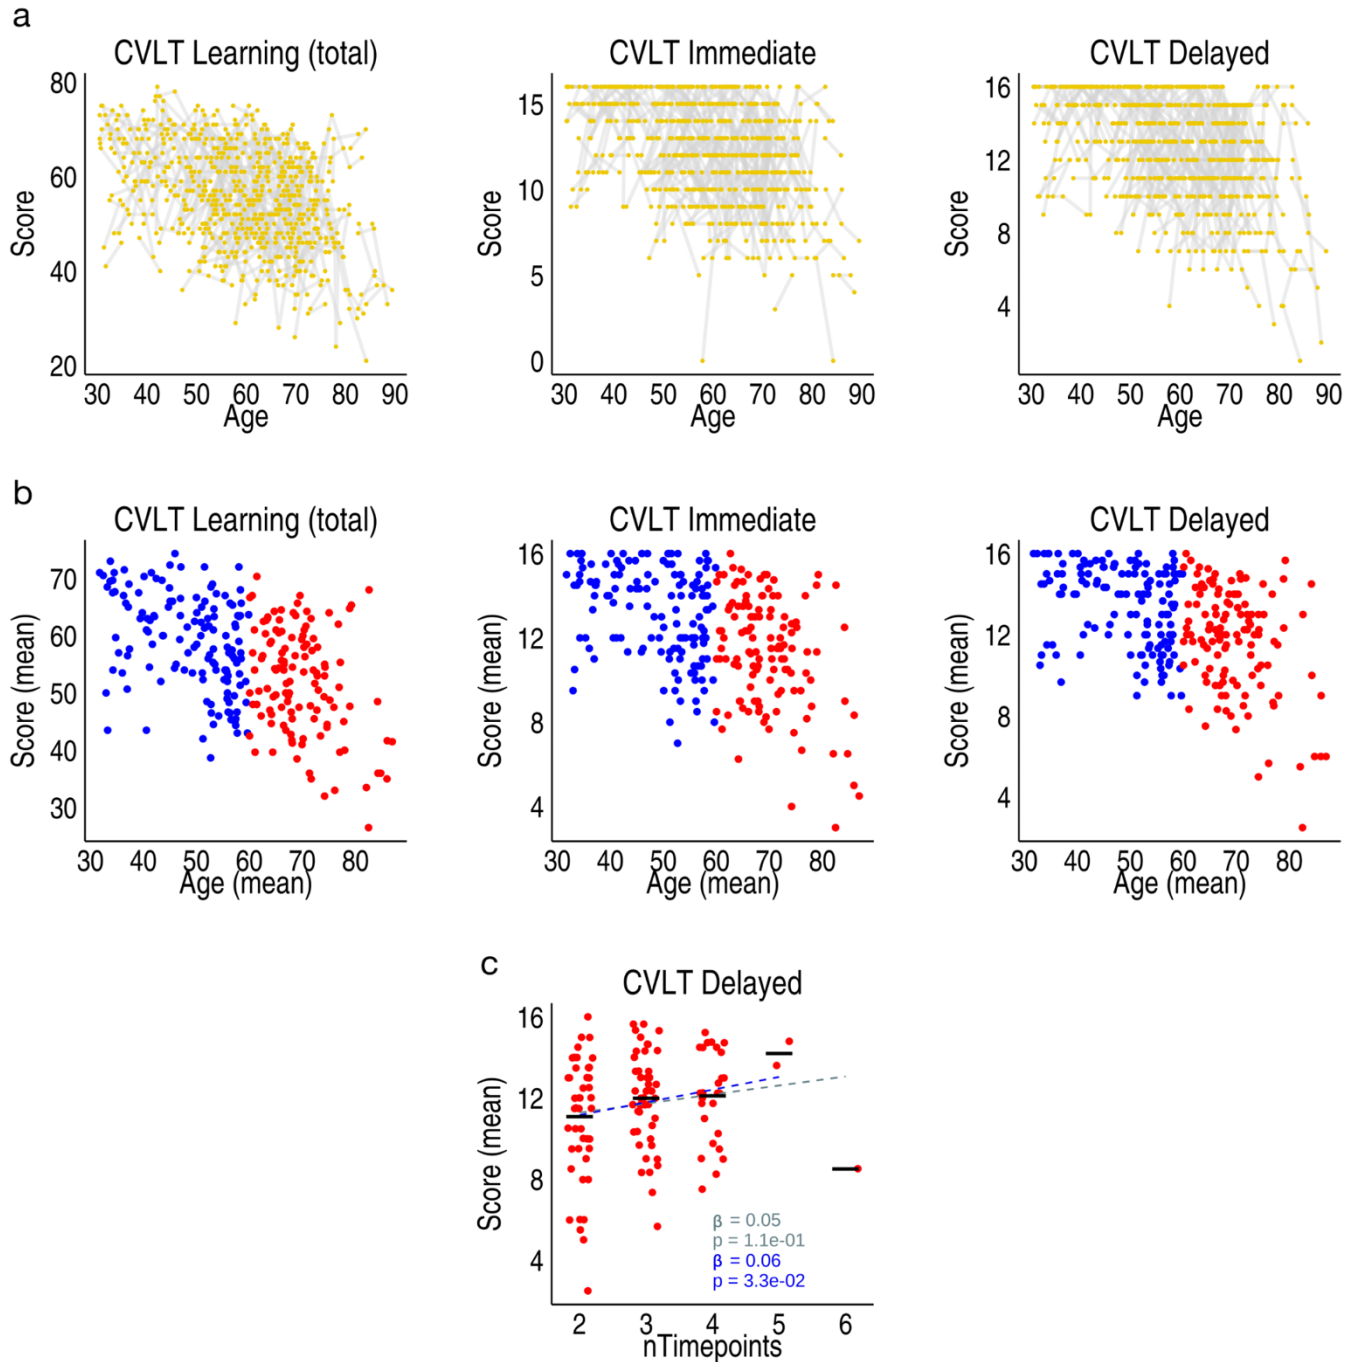

**SUPPLEMENTARY FIGURE 18**

**a** Spaghetti plot of raw memory scores on the CVLT learning subtests for the subset of individuals used to estimate memory change (707 observations of 261 individuals). **b** Individual-level mean scores across memory timepoints. Colour depicts mean age cut-off of 60 to highlight the overlapping distribution with younger participants. **c** In participants aged 60 and above, the data indicated that individuals with more repeat visits tended to have better mean CVLT Delayed scores (most challenging subtest). However, note the association was not significant across the full data, but became significant when discarding the only individual with 6 timepoints (who seemingly detracted from this pattern). For reader interpretation, models, estimates and p-values are shown, with and without this individual included.

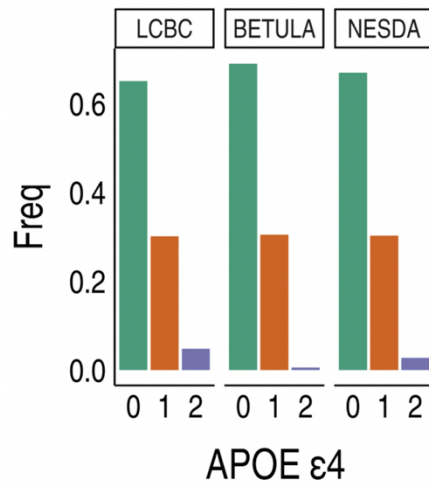

**SUPPLEMENTARY FIGURE 19**

Frequency of *APOE*- $\epsilon$ 4 genotypes per sample. Fishers exact tests indicated there were no significant differences between samples in the number of  $\epsilon$ 4 carriers (all  $p > .45$ ). A significant difference in *APOE*- $\epsilon$ 4 genotype was found between LCBC and BETULA only ( $p = .03$ ), likely reflecting more  $\epsilon$ 4 homozygotes in LCBC (see also [Supplementary Table 8](#)).

| Dataset     | Cohort | N Unique | N obs | N Timepoints            |  | Mean Time Interval (SD) | Interval Range | Mean Age (SD) | Age-Range   | Sex (f/m) | N Genetic |
|-------------|--------|----------|-------|-------------------------|--|-------------------------|----------------|---------------|-------------|-----------|-----------|
|             |        |          |       | 2, 3, 4, 5, 6, 7        |  |                         |                |               |             |           |           |
| Discovery   | LCBC   | 420      | 1430  | 135, 147, 45, 26, 60, 7 |  | 2.1(2.8)                | 0.14 – 11.1    | 63.7 (14.4)   | 30.1 – 89.4 | 248 / 172 | 229       |
| Replication | BETULA | 182      | 449   | 97,85, ----             |  | 3.0 (2.7)               | 3.5 – 7.7      | 64.3 (11.9)   | 30.9 – 87.9 | 85 / 97   | 175       |
|             | NESDA  | 138      | 331   | 83, 55, ----            |  | 2.5 (3.3)               | 1 – 10         | 45.1 (7.9)    | 30 – 65     | 91 / 47   | 118       |

### SUPPLEMENTARY TABLE 1

Description of the LCBC discovery healthy adult lifespan sample and the two Lifebrain cohorts that comprised the replication sample. Intervals are in years.

| Cognitive Test                  |          | Mean (SD)    | N   | N obs |
|---------------------------------|----------|--------------|-----|-------|
| <b>Mean MMSE (SD)</b>           | Age < 60 | 29.2 (0.7)   | 170 | 380   |
|                                 | Age > 60 | 28.8 (1.0)   | 247 | 886   |
| N = 417, obs = 1266             |          |              |     |       |
| <b>Mean FSIQ (SD)</b>           | Age < 60 | 117.3 (8.0)  | 166 | 341   |
|                                 | Age > 60 | 119.5 (10.2) | 249 | 516   |
| N = 415, obs = 857              |          |              |     |       |
| <b>Mean CVLT Learning (SD)</b>  | Age < 60 | 57.7 (10.1)  | 138 | 350   |
|                                 | Age > 60 | 51.0 (10.2)  | 123 | 357   |
| N = 261, obs = 707              |          |              |     |       |
| <b>Mean CVLT Immediate (SD)</b> | Age < 60 | 12.9 (10.0)  | "   | "     |
|                                 | Age > 60 | 11.0 (3.1)   | "   | "     |
| "                               |          |              |     |       |
| <b>Mean CVLT Delayed (SD)</b>   | Age < 60 | 13.1 (2.5)   | "   | "     |
|                                 | Age > 60 | 11.6 (3.0)   | "   | "     |
| "                               |          |              |     |       |

### SUPPLEMENTARY TABLE 2

Cognitive test scores in the LCBC discovery sample. Individual-level scores are calculated as the mean across their timepoints. Mini Mental State Examination (MMSE) and Full Scale IQ (Wechsler Abbreviated Scale of Intelligence) are given for all participants from the adult lifespan sample used to estimate brain change for which the data was available. CVLT scores are given for the subset used to estimate memory change (i.e., after discarding data from participants in memory training projects; Methods; Supplementary Note 1).

| Dataset     | Group   | N unique | N Obs | N Timepoints |    |     |     |    |    |    |    | Mean Time Interval (SD) | Interval Range | Mean Age (SD) | Age-Range   | Sex (f/m) | Mean MMSE      |                         | Mean Clinical Dementia Rating (CDR) |                         |
|-------------|---------|----------|-------|--------------|----|-----|-----|----|----|----|----|-------------------------|----------------|---------------|-------------|-----------|----------------|-------------------------|-------------------------------------|-------------------------|
|             |         |          |       | 2            | 3  | 4   | 5   | 6  | 7  | 8  | 9  |                         |                |               |             |           | All Timepoints | Longitudinal Timepoints | All Timepoints                      | Longitudinal Timepoints |
| ADNI        | NC-long | 372      | 1680  | 37           | 60 | 82  | 110 | 47 | 22 | 14 | 0  | 1.65 (1.47)             | 0.05-6.66      | 75.4 (6.1)    | 59.7 - 95   | 196 / 176 | 29.03          | 29.02                   | 0.08                                | 0.09                    |
|             | AD-long | 606      | 2730  | 55           | 86 | 197 | 147 | 53 | 35 | 21 | 12 | 1.5 (1.32)              | 0.07-6.48      | 75.4 (7.3)    | 55 - 92.9   | 257 / 349 | 23.94          | 23.53                   | 3.95                                | 4.24                    |
| AIBL (test) | NC-long | 128      | 435   | 21           | 34 | 73  |     |    |    |    |    | 2.9 (1.4)               | 1.1-6.5        | 73 (7)        | 60.5 - 90.2 | 65 / 63   | 28.95          | 28.95                   | 0.02                                | 0.01                    |
|             | AD-long | 39       | 107   | 17           | 15 | 7   |     |    |    |    |    | 2.5 (1.1)               | 1.3-5.2        | 74.9 (7.6)    | 55 - 89.2   | 20 / 19   | 21.91          | 20.5                    | 0.74                                | 0.84                    |

### SUPPLEMENTARY TABLE 3

Description of the longitudinal ADNI training and AIBL test data. Intervals are in years.

| Sample | Scanner        | Tesla | Sequence parameters                                                                                                       |
|--------|----------------|-------|---------------------------------------------------------------------------------------------------------------------------|
| LCBC   | Avanto Siemens | 1.5   | TR: 2,400 ms, TE: 3.61 ms, TI: 1,000 ms, flip angle: 8°, slice thickness: 1.2 mm, FoV: 240 × 240 mm, 160 slices, iPat = 2 |
|        | Avanto Siemens | 1.5   | TR: 2,400 ms, TE = 3.79 ms, TI = 1,000 ms, flip angle = 8, slice thickness: 1.2 mm, FoV: 240 × 240 mm, 160 slices         |
|        | Skyra Siemens  | 3.0   | TR: 2,300 ms, TE: 2.98 ms, TI: 850 ms, flip angle: 8°, slice thickness: 1 mm, FoV: 256 × 256 mm, 176 slices               |
| BETULA | Discovery GE   | 3.0   | TR: 8.19 ms, TE: 3.2 ms, TI: 450 ms, flip angle: 12°, slice thickness: 1 mm, FOV 250 × 250 mm, 180 slices                 |
| NESDA  | Phillips       | 3.0   | TR: 9 ms; TE: 3.5 ms; slice thickness: 1 mm, FOV: 256 x 256 mm, 170 slices.                                               |

### SUPPLEMENTARY TABLE 4

#### MRI parameters

FoV = field of view, iPat = in-plane acceleration, TE = echo time, TI = inversion time, TR = repetition time.

| Score    | nSNPs  |                          |
|----------|--------|--------------------------|
|          | PRS-AD | PRS-AD <sup>noAPOE</sup> |
| Jansen   | 59     | 27                       |
| Kunkle   | 42     | 16                       |
| Lambert  | 33     | 13                       |
| Wightman | 81     | 42                       |

### SUPPLEMENTARY TABLE 5

The number of SNPs used to construct each PRS score.

| stage                   | struct            | score    | effect          | beta  | stderr | t     | p              | df  |
|-------------------------|-------------------|----------|-----------------|-------|--------|-------|----------------|-----|
| Braak II                | Left Hippocampus  | Jansen   | age_interaction | -0.21 | 0.07   | -2.92 | <b>0.00387</b> | 211 |
| Braak II                | Left Hippocampus  | Lambert  | age_interaction | -0.18 | 0.07   | -2.58 | <b>0.01062</b> | 211 |
| Braak II                | Left Hippocampus  | Kunkle   | age_interaction | -0.18 | 0.07   | -2.46 | <b>0.01487</b> | 211 |
| Braak II                | Left Hippocampus  | Wightman | age_interaction | -0.22 | 0.07   | -3.1  | <b>0.00219</b> | 211 |
| Braak II                | Right Hippocampus | Jansen   | age_interaction | -0.17 | 0.07   | -2.36 | <b>0.01925</b> | 211 |
| Braak II                | Right Hippocampus | Lambert  | age_interaction | -0.14 | 0.07   | -2.14 | <b>0.03351</b> | 211 |
| Braak II                | Right Hippocampus | Kunkle   | age_interaction | -0.19 | 0.07   | -2.74 | <b>0.00676</b> | 211 |
| Braak II                | Right Hippocampus | Wightman | age_interaction | -0.18 | 0.07   | -2.63 | <b>0.00928</b> | 211 |
| Braak I                 | Left entorhinal   | Jansen   | age_interaction | -0.06 | 0.08   | -0.76 | 0.44868        | 211 |
| Braak I                 | Left entorhinal   | Lambert  | age_interaction | -0.05 | 0.07   | -0.66 | 0.50907        | 211 |
| Braak I                 | Left entorhinal   | Kunkle   | age_interaction | 0     | 0.07   | -0.01 | 0.98997        | 211 |
| Braak I                 | Left entorhinal   | Wightman | age_interaction | -0.1  | 0.07   | -1.33 | 0.18490        | 211 |
| Braak I                 | Right entorhinal  | Jansen   | age_interaction | -0.1  | 0.07   | -1.37 | 0.17311        | 211 |
| Braak I                 | Right entorhinal  | Lambert  | age_interaction | -0.05 | 0.07   | -0.75 | 0.45180        | 211 |
| Braak I                 | Right entorhinal  | Kunkle   | age_interaction | -0.06 | 0.07   | -0.82 | 0.41544        | 211 |
| Braak I                 | Right entorhinal  | Wightman | age_interaction | -0.16 | 0.07   | -2.21 | <b>0.02834</b> | 211 |
| Braak III (subcortical) | Left Amygdala     | Jansen   | age_interaction | -0.13 | 0.07   | -1.88 | 0.06098        | 211 |
| Braak III (subcortical) | Left Amygdala     | Lambert  | age_interaction | -0.1  | 0.06   | -1.54 | 0.12478        | 211 |
| Braak III (subcortical) | Left Amygdala     | Kunkle   | age_interaction | -0.11 | 0.07   | -1.57 | 0.11864        | 211 |
| Braak III (subcortical) | Left Amygdala     | Wightman | age_interaction | -0.13 | 0.07   | -1.89 | 0.06026        | 211 |
| Braak III (subcortical) | Right Amygdala    | Jansen   | age_interaction | -0.18 | 0.07   | -2.46 | <b>0.01459</b> | 211 |
| Braak III (subcortical) | Right Amygdala    | Lambert  | age_interaction | -0.11 | 0.07   | -1.68 | 0.09410        | 211 |
| Braak III (subcortical) | Right Amygdala    | Kunkle   | age_interaction | -0.17 | 0.07   | -2.46 | <b>0.01485</b> | 211 |
| Braak III (subcortical) | Right Amygdala    | Wightman | age_interaction | -0.19 | 0.07   | -2.7  | <b>0.00743</b> | 211 |
| Braak III (cortical)    | Left temporal     | Jansen   | age_interaction | -0.14 | 0.07   | -1.89 | 0.06079        | 211 |
| Braak III (cortical)    | Left temporal     | Lambert  | age_interaction | -0.07 | 0.07   | -1.07 | 0.28520        | 211 |
| Braak III (cortical)    | Left temporal     | Kunkle   | age_interaction | -0.12 | 0.07   | -1.72 | 0.08707        | 211 |
| Braak III (cortical)    | Left temporal     | Wightman | age_interaction | -0.16 | 0.07   | -2.21 | <b>0.02817</b> | 211 |
| Braak III (cortical)    | Right temporal    | Jansen   | age_interaction | -0.13 | 0.07   | -1.78 | 0.07726        | 211 |
| Braak III (cortical)    | Right temporal    | Lambert  | age_interaction | -0.12 | 0.07   | -1.84 | 0.06663        | 211 |
| Braak III (cortical)    | Right temporal    | Kunkle   | age_interaction | -0.13 | 0.07   | -1.83 | 0.06887        | 211 |
| Braak III (cortical)    | Right temporal    | Wightman | age_interaction | -0.16 | 0.07   | -2.37 | <b>0.01893</b> | 211 |

### SUPPLEMENTARY TABLE 6

Results from alternative analyses dependent on power across the full age-range (30-89 years; N = 229). Linear PRS-AD \* mean age interactions upon age-relative change that were significant at  $p < .05$  (uncorrected) are in bold. None of the tests survived FDR-correction across the 32 tests in this analysis.

| stage | struct                   | score    | effect          | beta | stderr | t    | p                | df  |
|-------|--------------------------|----------|-----------------|------|--------|------|------------------|-----|
| -     | PC1 <sup>relChange</sup> | Jansen   | age_interaction | 0.23 | 0.07   | 3.21 | * <b>0.00154</b> | 211 |
| -     | PC1 <sup>relChange</sup> | AD       | age_interaction | 0.19 | 0.07   | 2.74 | * <b>0.00664</b> | 211 |
| -     | PC1 <sup>relChange</sup> | Kunkle   | age_interaction | 0.22 | 0.07   | 3.07 | * <b>0.00243</b> | 211 |
| -     | PC1 <sup>relChange</sup> | Wightman | age_interaction | 0.22 | 0.07   | 3.2  | * <b>0.00159</b> | 211 |

#### SUPPLEMENTARY TABLE 7

Results from alternative analyses dependent upon power across the full age-range (30-89 years; N = 229). FDR-corrected significant linear PRS-AD \* mean age interactions (in bold denoted with \*) upon PC1<sup>relChange</sup> were found for all four GWAS-derived scores, indicative of steeper effects of PRS-AD upon multivariate age-relative change across AD-sensitive features in older ages. Note that hippocampal and amygdala volumes were not included in PC1<sup>relChange</sup> to ensure these did not drive the multivariate effect (see Fig. 4A). FDR-correction was applied across all 4 tests performed in this analysis.

| Sample | N Genetic | APOE genotypes |         |         |         |         |         |
|--------|-----------|----------------|---------|---------|---------|---------|---------|
|        |           | e2 / e2        | e2 / e3 | e2 / e4 | e3 / e3 | e3 / e4 | e4 / e4 |
| LCBC   | 229       | 26             | -       | 8       | 123     | 61      | 11      |
| BETULA | 175*      | -              | 18      | 5       | 102     | 48      | 1       |
| NESDA  | 118*      | -              | -       | -       | 73      | 33      | 3       |

#### SUPPLEMENTARY TABLE 8

APOE genotypes per sample. \*Because APOE alleles were derived using imputed genotypes (1000 Genomes Project Phase 3; hg19 build), 9 individuals in NESDA, and 1 individual in BETULA had ambiguous genotypes due to not having direct access to the two APOE indexing SNPs.

## SUPPLEMENTARY NOTE 1

### LCBC Samples

The main discovery sample consisted of magnetic resonance imaging (MRI) data collected across 5 projects at the Center for Lifespan Changes in Brain and Cognition (LCBC; Department of Psychology, University of Oslo). For the brain change analysis, to optimize individual-specific change estimates for all individuals, we used as many longitudinal observations as we could gather. Notably, the samples described below were all used in the brain change analysis, but many of these individuals had no genetic observations, and thus were not included in the PRS-AD association tests (see below). Brain change data over the following projects were used, and the number of individuals included in the genetic analysis [max N = 229] is also given per project. For the memory change analysis, to optimize individual-specific memory slopes for all we also used as many usable longitudinal memory observations as we could. However, we discarded all data for individuals involved in memory training projects with on-off designs over time, deemed likely to induce non-linear effects upon the individual-specific memory slopes.

### Cognition and Plasticity Through the Lifespan (MemP):

For the brain change analysis, **537** scans of **185** individuals (mean age =  $59.5 \pm 13.0$ , age-range = 30.6 – 89.4, females = 110, 2–7 timepoints [TP's]), collected on 3 different scanners were used (N 2TP's = 57, 3TP's = 93, 4TP's = 33, 5TP's = 1, 7TP's = 1). The number of scans used here collected on each scanner was 489 (1.5T Avanto), 46 (3.0T Skyra) and 2 (3.0T Prisma), respectively.

*For the genetic analysis, 81 individuals originated from this project.*

*To estimate individual-specific memory slopes, 522 observations from 185 individuals originated from this project,*

This is an ongoing longitudinal study where cognitively healthy adults have undergone MRI scanning and neuropsychological evaluation. The study consists of four main recruitment waves (though note that the number of longitudinal timepoints ranges from 2-7). New participants were recruited at waves 1, 3 and 4. Participants were scanned up to 11.1 years after the initial scan. The interval between waves was approximately 3.5, 4.4 and, 1.7 years, respectively. Data acquisition took place between 2006 and 2023 at the center for LCBC. For more details see <sup>1,2</sup>. Volunteers were initially recruited by newspaper advertisements and later contacted by mail for follow-ups. MRI sequences were acquired across three scanners (1.5T Avanto, 3.0T Skyra, 3.0T Prisma).

### Constructive Memory (MemC):

For the brain change analysis, **85** scans of **42** individuals (mean age =  $53.9 \pm 13.4$ , age-range = 30.5 – 80.8, females = 24, 2-3 timepoints [TP's]), collected across two scanners were used (N 2TP's = 41, 3TP's = 1). The number of scans here collected on each scanner was 84 (3.0T Skyra) and 1 (3.0T Prisma), respectively.

*For the genetic analysis, 30 individuals originated from this project.*

*To estimate individual-specific memory slopes, 80 observations from 41 individuals originated from this project.*

This project is a cross-sectional study where cognitively healthy adults underwent an fMRI source-item memory task. The protocol also included MRI scanning and neuropsychological evaluation. The sample was collected at the center for LCBC. The project is nested within the longitudinal Cognition and Plasticity through the Lifespan project. Data acquisition took place between 2013 and 2015. MRI sequences were acquired with a 3.0T Skyra scanner. See <sup>3,4</sup> for more details.

### Neurocognitive Plasticity (NCP):

For the brain change analysis, **637** scans of **130** individuals (mean age =  $70.5 \pm 12.3$ , age-range = 30.1 – 84.0, females = 79; 2-3 timepoints [TP's]), collected on a single scanner (3.0T Skyra) were used (N 2TP's = 17, 3TP's = 11, 4TP's = 12, 5TP's = 24, 6TP's = 60, 7TP's = 6).

*For the genetic analysis, 117 individuals originated from this project.*

*To estimate individual-specific memory slopes, 0 observations originated from this project (due to the complex on-off memory training design over time likely to induce non-linear effects upon individual-specific memory slopes; see below)*

This study consists of an experimental project of memory training with the “method of loci”, employing an on-off training design over time. The study includes two groups of participants (young and old) that underwent an ABAB design where a batch in each group started with a resting condition, and the other started with memory training (after a baseline test). The study also includes an active group without memory training. The participants were initially scanned up to 6 times, five of them before/after a block of training while the sixth time point consisted of a follow-up  $\approx 2$  years after the intervention (note that several participants also have a seventh timepoint). Participants were recruited through newspaper and web page adverts and were screened with a health interview. Participants were required to be either young or older (in or around their 20s or 70s, respectively) healthy adults. Data acquisition took place between 2013 and 2018. MRI sequences were acquired with a 3.0T Skyra scanner. See <sup>5,6</sup> for more details.

**Method of Loci (Loci):**

For the brain change analysis, **112** scans of **41** individuals (mean age =  $63.2 \pm 9.1$ , age-range = 41.9 – 82.6, females = 22; 2-5 timepoints [TP's]), collected across two scanners were used (N 2TP's = 13, 3TP's = 27, 5TP's = 1). The number of scans used here collected on each scanner was 110 (1.5T Avanto) and 2 (3.0T Skyra), respectively.

*For the genetic analysis, 1 individual originated from this project (individual with 5 timepoints; see below).*

*To estimate individual-specific memory slopes, 111 observations from 41 individuals originated from this project (due to the simple pre-post memory training design [see below], individual-specific slopes are likely to be linear; note also that as only 1 individual here had genetic data, results of the longitudinal memory change analyses in the main paper – requiring individuals with both genetic and memory data – are unaffected by including this project, except insofar as the additional longitudinal observations may boost power to estimate individual-specific memory slopes for all; see below)*

This study consists of an eight-week simple pre-post memory training experiment focused on improving verbal recall memory by implementing the mnemonic technique “method of loci”. Participants were scanned three times as part of the project: pre and post-training and a follow-up after 5 years. The number of timepoints included here therefore typically ranges from 2-3, though we note one participant originating from this project and included in the genetic analyses had 5 timepoints, as they were assimilated into (or later found to be a duplicate ID) of a later LCBC project (MemC). The full project included both healthy controls and memory clinic patients. Only data from healthy controls was used here. Healthy volunteers were recruited through a local newspaper ad, screened by a structured interview, and randomly assigned to either an intervention group or a control group serving as passive controls. Cognitive assessments and the memory training program were conducted at the center for LCBC. Data acquisition for waves 1 and 2 took place between 2007 and 2008 while the third wave was acquired in 2013. MRI sequences were acquired with a 1.5T Avanto scanner. See <sup>7,8</sup> for more details.

**Set to Change (S2C):**

For the brain change analysis, **59** scans of **22** individuals (mean age =  $44.6 \pm 16.8$ , age-range = 30.2 – 79.0, females = 13), collected on a single scanner (3.0T Prisma) were used (N 2TP's = 7, 3TP's = 15).

*For the genetic analysis, 0 individuals originated from this project (individuals were twins; see below).*

*To estimate individual-specific memory slopes, 0 observations originated from this project (due to the complex on-off memory training design over time likely to induce non-linear effects upon individual-specific memory slopes; see below)*

This is the first LCBC twin project, where twins were invited to participate, as recruited through either the Norwegian twin registry or via ads on social media platforms. The project consists of a targeted experimental approach to test differences in neurocognitive plasticity by training of younger and older adult mono- (MZ) and dizygotic (DZ) twins. The project employs a memory intervention using navigation training while cycling in virtual reality through a bespoke virtual city. Twins are assessed with brain MRI, and cognitive measures at multiple time points across 2.5 years pre- and post- a 10 week intervention in a AB/BA crossover design. Data acquisition began in 2019 and is ongoing. MRI sequences were acquired with a 3.0T Prisma scanner. Of the 22 individuals included in the brain change analysis here, 14 were MZ whereas 8 were DZ twins.

**Common information:**

Common exclusion criteria across all LCBC projects are outlined in the main paper. Written informed consent was obtained from all participants, and all studies were approved by the Regional Ethical Committee of South Norway.



## SUPPLEMENTARY NOTE 2

### Dataset access

Requests for access to the raw data can be directed to the Principal Investigators of the contributing studies: LCBC (Anders M. Fjell; anders.m.fjell@psykologi.uio.no), BETULA (Lars Nyberg; lars.nyberg@umu.se), NESDA (Brenda Penninx; b.penninx@amsterdamumc.nl). ADNI and AIBL (<https://adni.loni.usc.edu/data-samples/access-data/>).

### Supplementary References

1. Storsve, A. B. et al. Differential Longitudinal Changes in Cortical Thickness, Surface Area and Volume across the Adult Life Span: Regions of Accelerating and Decelerating Change. *J. Neurosci.* 34, 8488–98 (2014).
2. Vidal-Pineiro, D. et al. Cellular correlates of cortical thinning throughout the lifespan. *Sci. Rep.* 10, 1–14 (2020).
3. Vidal-Piñeiro, D. et al. Maintained Frontal Activity Underlies High Memory Function Over 8 Years in Aging. *Cereb. Cortex* 1–13 (2018). doi:10.1093/cercor/bhy177
4. Vidal-Piñeiro, D. et al. The Functional Foundations of Episodic Memory Remain Stable Throughout the Lifespan. *Cereb. Cortex* 1–13 (2020). doi:10.1093/cercor/bhaa348
5. de Lange, A.-M. G. et al. The effects of memory training on behavioral and microstructural plasticity in young and older adults. *Hum. Brain Mapp.* 5680, 5666–5680 (2017).
6. Bräthen, A. C. S. et al. Multimodal cortical and hippocampal prediction of episodic-memory plasticity in young and older adults. *Hum. Brain Mapp.* 39, 4480–4492 (2018).
7. Engvig, A. et al. Memory training impacts short-term changes in aging white matter: A Longitudinal Diffusion Tensor Imaging Study. *Hum. Brain Mapp.* 33, 2390–2406 (2012).
8. Engvig, A. et al. Effects of memory training on cortical thickness in the elderly. *Neuroimage* 52, 1667–1676 (2010).

### Acknowledgements

#### The Australian Imaging, Biomarker and Lifestyle Flagship Study of Ageing (AIBL)

Colin L. Masters<sup>25</sup>, Christopher C. Rowe<sup>25,26</sup>, Jurgen Fripp<sup>29</sup>, Ralph Martins<sup>28</sup>, David Ames<sup>31</sup>, Christopher Fowler<sup>25</sup>, Stephanie Rainey-Smith<sup>28</sup>, Vincent Dore<sup>30</sup>, Paul Maruff<sup>34</sup>, Kevin Taddei<sup>28</sup>, Simon Laws<sup>27</sup>, Ashley I. Bush<sup>25</sup>, Jo Robertson<sup>25</sup>, Brett Trounson<sup>25</sup>, Qiao-Xin Li<sup>25</sup>, Alyce Russell<sup>27</sup>, Madeline Peretti<sup>27</sup>, Lidija Milicic<sup>27</sup>, Lucy Lim<sup>28</sup>, Mark Rodrigues<sup>28</sup>, Tania Taddei<sup>28</sup>, Eugene Hone<sup>28</sup>, Florence Lim<sup>28</sup>, Shane Fernandez<sup>28</sup>, Steve Pedrini<sup>28</sup>, James Doecke<sup>29</sup>, Pierrick Bourgeat<sup>29</sup>, Simon Gibson<sup>29</sup>, Hugo Leroux<sup>29</sup>, David Hanson<sup>29</sup>, Ping Zhang<sup>30</sup>, Elizabeth Cyarto<sup>31</sup>, Brendan Silbert<sup>32</sup>, Belinda Brown<sup>33</sup>, Harmid Sohrabi<sup>33</sup>.

<sup>25</sup>The Florey Institute, The University of Melbourne, Parkville, VIC, Australia.

<sup>26</sup>Collaborative Genomics Group, Centre of Excellence for Alzheimer's Disease Research and Care, School of Medical and Health Sciences, Edith Cowan University, Joondalup, WA, Australia.

<sup>27</sup>School of Medical and Health Sciences, Edith Cowan University, Joondalup, WA, Australia.

<sup>28</sup>CSIRO, Herston, QLD, Australia.

<sup>29</sup>CSIRO, Melbourne, VIC, Australia.

<sup>30</sup>Department of Molecular Imaging, Austin Health, Heidelberg, VIC, Australia.

<sup>31</sup>National Ageing Research Institute, Parkville, VIC, Australia.

<sup>32</sup>St. Vincent Hospital, Fitzroy, VIC, Australia.

<sup>33</sup>Department of Exercise Science, College of Science, Health, Engineering and Education, Murdoch University, Murdoch, WA, Australia.

**ACKNOWLEDGEMENT LIST FOR ADNI PUBLICATIONS**

The Data and Publications Committee, in keeping with the publication policies adopted by the ADNI Steering Committee, here provide lists for standardized acknowledgement. The list consists of two parts: Infrastructure Investigators and Site Investigators. Infrastructure Investigators represent the names responsible for leadership and infrastructure. Site Investigators represent the names of individuals at each recruiting site. All papers, including methodological papers, should have an acknowledgement list that consists of Infrastructure Investigators plus the FULL list.

**I. ADNI 1, GO, 2, 3, 4**

**Part A: Leadership and Infrastructure**

**Principal Investigator**

|                    |                                                                                                     |
|--------------------|-----------------------------------------------------------------------------------------------------|
| Michael Weiner, MD | University of California, San Francisco<br>Northern California Institute for Research and Education |
|--------------------|-----------------------------------------------------------------------------------------------------|

**ATRI PI and Director of Coordinating Center Clinical Core**

|                          |                                                    |
|--------------------------|----------------------------------------------------|
| Paul Aisen, MD           | University of Southern California                  |
| Ronald Petersen, MD, PhD | Mayo Clinic, Rochester (co-PI of of Clinical Core) |

**Executive Committee**

|                            |                                              |
|----------------------------|----------------------------------------------|
| Michael Weiner, MD         | University of California, San Francisco      |
| Paul Aisen, MD             | University of Southern California            |
| Ronald Petersen, MD, PhD   | Mayo Clinic, Rochester                       |
| Clifford R. Jack, Jr., MD  | Mayo Clinic, Rochester                       |
| William Jagust, MD         | University of California, Berkeley           |
| Susan Landau, PhD          | University of California, Berkeley           |
| Monica Rivera-Mindt, PhD   | Fordham University; Mt. Sinai Medical Center |
| Ozioma Okonkwo, PhD        | University of Wisconsin                      |
| Leslie M. Shaw, PhD        | University of Pennsylvania                   |
| Edward B. Lee, MD, PhD     | University of Pennsylvania                   |
| Arthur W. Toga, PhD        | University of California, Los Angeles        |
| Laurel Beckett, PhD        | University of California, Davis              |
| Danielle Harvey, PhD       | University of California, Davis              |
| Robert C. Green, MD, MPH   | Boston University                            |
| Andrew J. Saykin, PsyD     | Indiana University                           |
| Kwangsik Nho, PhD          | Indiana University                           |
| Richard J. Perrin, MD, PhD | Washington University St. Louis              |
| Duygu Tosun, PhD           | University of California, San Francisco      |

**ADNI 4 Private Partner Scientific Board (PPSB) Convened by Alzheimer's Association**

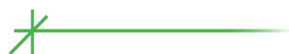

Pallavi Sachdev, PhD

Eisai (Chair, 2023-2024)

**Data and Publication Committee (DPC)**

Robert C. Green, MD, MPH

Harvard University (Chair)

Erin Drake

Harvard University

**Resource Allocation Review Committee**

Tom Montine, MD, PhD

University of Washington (Chair)

Cat Conti, BA

Northern California Institute for Research and Education

**Administrative Core Leaders and Key Personnel**

Michael W. Weiner, MD

University of California, San Francisco

Rachel Nosheny, PhD

University of California, San Francisco

Diana Truran Sacrey

Northern California Institute for Research and Education

Juliet Fockler

University of California, San Francisco

Melanie J. Miller, PhD

Northern California Institute for Research and Education

Catherine (Cat) Conti

Northern California Institute for Research and Education

Winnie Kwang, MA

University of California, San Francisco

Chengshi Jin, PhD

University of California, San Francisco

Adam Diaz, MS

Northern California Institute for Research and Education

Miriam Ashford, PhD

Northern California Institute for Research and Education

Derek Flenniken

Northern California Institute for Research and Education

Adrienne Kormos

Northern California Institute for Research and Education

**Clinical Core Leaders and Key Personnel**

Ronald Petersen, MD, PhD

Mayo Clinic, Rochester (Core PI)

Paul Aisen, MD

University of Southern California (Core PI)

Michael Rafii, MD, PhD

University of Southern California

Rema Raman, PhD

University of Southern California

Gustavo Jimenez, MBS

University of Southern California

Michael Donohue, PhD

University of Southern California

Jennifer Salazar, MBS

University of Southern California

Andrea Fidell, MPH

University of Southern California

Virginia Boatwright, BS

University of Southern California

Justin Robison, MS

University of Southern California

Caileigh Zimmerman, MS

University of Southern California

Yuliana Cabrera, BS

University of Southern California



|                          |                                   |
|--------------------------|-----------------------------------|
| Sarah Walter, MSc        | University of Southern California |
| Taylor Clanton, MPH      | University of Southern California |
| Elizabeth Shaffer, BS    | University of Southern California |
| Caitlin Webb, BA         | University of Southern California |
| Lindsey Hergesheimer, BS | University of Southern California |
| Stephanie Smith, BS      | University of Southern California |
| Sheila Ogwang, MPH       | University of Southern California |
| Olusegun Adegoke, MSc    | University of Southern California |
| Payam Mahboubi, MPH      | University of Southern California |
| Jeremy Pizzola, BA       | University of Southern California |
| Cecily Jenkins, PhD      | University of Southern California |

**Biostatistics Core Leaders and Key Personnel**

|                       |                                                          |
|-----------------------|----------------------------------------------------------|
| Laurel Beckett, PhD   | University of California, Davis (Core PI)                |
| Danielle Harvey, PhD  | University of California, Davis (Core PI)                |
| Michael Donohue, PhD  | University of Southern California                        |
| Naomi Saito, MS       | University of California, Davis                          |
| Adam Diaz, MS         | Northern California Institute for Research and Education |
| Kedir Adem Hussen, MS | University of Southern California                        |

**Engagement Core Leaders and Key Personnel**

|                            |                                         |
|----------------------------|-----------------------------------------|
| Ozioma Okonkwo, PhD        | University of Wisconsin (Core-PI)       |
| Monica Rivera-Mindt, PhD   | Fordham University; Mt. Sinai (Core-PI) |
| Hannatu Amaza              | University of Wisconsin                 |
| Mai Seng Thao              | University of Wisconsin                 |
| Shaniya Parkins            | Mt. Sinai                               |
| Omobolanle Ayo, MBChB, MPH | Mt. Sinai                               |
| Matt Glittenberg           | University of Wisconsin                 |
| Isabella Hoang             | University of Wisconsin                 |
| Kaori Kubo Germano, PhD    | Fordham University                      |
| Joe Strong, PhD            | University of Wisconsin                 |
| Trinity Weisensel          | University of Wisconsin                 |
| Fabiola Magana             | University of Wisconsin                 |
| Lisa Thomas                | University of Wisconsin                 |
| Vanessa Guzman, PhD        | Mt. Sinai                               |
| Adeyinka Ajayi, MBBS, MPH  | Mt. Sinai                               |
| Joseph Di Benedetto, LMSW  | Mt. Sinai                               |
| Sandra Talavera, MSW       | Fordham University                      |

**MRI Core Leaders and Key Personnel**

|                           |                                  |
|---------------------------|----------------------------------|
| Clifford R. Jack, Jr., MD | Mayo Clinic, Rochester (Core PI) |
|---------------------------|----------------------------------|



|                             |                                                          |
|-----------------------------|----------------------------------------------------------|
| Joel Felmlee, PhD           | Mayo Clinic, Rochester                                   |
| Nick C. Fox, MD             | University College London                                |
| Paul Thompson, PhD          | UCLA School of Medicine                                  |
| Charles DeCarli, MD         | University of California, Davis                          |
| Arvin Forghanian-Arani, PhD | Mayo Clinic, Rochester                                   |
| Bret Borowski, RTR          | Mayo Clinic, Rochester                                   |
| Calvin Reyes                | Mayo Clinic, Rochester                                   |
| Caitie Hedberg              | Mayo Clinic, Rochester                                   |
| Chad Ward                   | Mayo Clinic, Rochester                                   |
| Christopher Schwarz, PhD    | Mayo Clinic, Rochester                                   |
| Denise Reyes                | Mayo Clinic, Rochester                                   |
| Jeff Gunter, PhD            | Mayo Clinic, Rochester                                   |
| John Moore-Weiss, PhD       | Mayo Clinic, Rochester                                   |
| Kejal Kantarci, MD          | Mayo Clinic, Rochester                                   |
| Leonard Matoush             | Mayo Clinic, Rochester                                   |
| Matthew Senjem, MS          | Mayo Clinic, Rochester                                   |
| Prashanthi Vemuri, PhD      | Mayo Clinic, Rochester                                   |
| Robert Reid, PhD            | Mayo Clinic, Rochester                                   |
| Ian Malone, PhD             | University College London                                |
| Sophia I. Thomopoulos, BS   | University of Southern California School of Medicine     |
| Talia M. Nir, PhD           | University of Southern California School of Medicine     |
| Neda Jahanshad, PhD         | University of Southern California School of Medicine     |
| Alexander Knaack, MS        | University of California, Davis                          |
| Evan Fletcher, PhD          | University of California, Davis                          |
| Danielle Harvey, PhD        | University of California, Davis                          |
| Duygu Tosun-Turgut, PhD     | University of California, San Francisco                  |
| Stephanie Rossi Chen, BA.   | Northern California Institute for Research and Education |
| Mark Choe, BS               | Northern California Institute for Research and Education |
| Karen Crawford              | University of Southern California School of Medicine     |
| Paul A. Yushkevich, PhD     | University of Pennsylvania                               |
| Sandhitsu Das, PhD          | University of Pennsylvania                               |

**PET Core Leaders and Key Personnel**

|                       |                                              |
|-----------------------|----------------------------------------------|
| William Jagust, MD    | University of California, Berkeley (Core PI) |
| Susan Landau, PhD     | University of California, Berkeley (Core PI) |
| Robert A. Koeppe, PhD | University of Michigan                       |
| Gil Rabinovici        | University of California San Francisco       |
| Victor Villemagne     | University of Pittsburgh                     |
| Brian LoPresti        | University of Pittsburgh                     |

**Neuropathology Core Leaders and Key Personnel**

|                            |                                           |
|----------------------------|-------------------------------------------|
| Richard J. Perrin, MD, PhD | Washington University St. Louis (Core PI) |
| John Morris, MD            | Washington University St. Louis           |
| Erin Franklin, MS          | Washington University St. Louis           |



Haley Bernhardt, BA, R. EEG T. Washington University St. Louis  
 Nigel J. Cairns, PhD, MRCPATH Washington University St. Louis  
 Lisa Taylor-Reinwald, BA, HTL (ASCP) Washington University St. Louis

#### **Biomarkers Core Leader and Key Personnel**

Leslie Shaw, PhD UPenn School of Medicine (Core PI)  
 Edward B. Lee, MD, PhD University of Pennsylvania (Core PI)  
 Virginia M.Y. Lee, PhD, MBA UPenn School of Medicine  
 Magdalena Korecka, PhD UPenn School of Medicine  
 Magdalena Brylska, MS UPenn School of Medicine  
 Yang Wan, MS UPenn School of Medicine  
 J.Q. Trojanowki, MD, PhD\* UPenn School of Medicine (\*former Core PI, deceased)

#### **Informatics Core Leader and Key Personnel**

Arthur W. Toga, PhD University of Southern California (Core PI)  
 Karen Crawford, MLIS University of Southern California  
 Scott Neu, PhD University of Southern California

#### **Genetics Core Leader and Key Personnel**

Andrew J. Saykin, PsyD Indiana University School of Medicine (Core PI)  
 Kwangsik Nho, PhD Indiana University School of Medicine (Core PI)  
 Tatiana M. Foroud, PhD Indiana University School of Medicine (Dir. NCRAD)  
 Taeho Jo, PhD Indiana University School of Medicine  
 Shannon L. Risacher, PhD Indiana University School of Medicine  
 Hannah Craft, MPH Indiana University School of Medicine  
 Liana G. Apostolova, MD Indiana University School of Medicine  
 Kelly Nudelman, PhD NCRAD/Indiana University School of Medicine  
 Kelley Faber, MS, CCRC NCRAD/Indiana University School of Medicine  
 Zoë Potter, BA, CCRP NCRAD/Indiana University School of Medicine  
 Kaci Lacy, MPH, CCRP NCRAD/Indiana University School of Medicine  
 Rima Kaddurah-Daouk, PhD Duke University/AD Metabolomics Consortium  
 Li Shen, PhD University of Pennsylvania

#### **ADNI4 Amyloid Disclosure Team**

Jason Karlawish, MD University of Pennsylvania  
 Claire Erickson, PhD University of Pennsylvania  
 Joshua Grill PhD University of California, Irvine  
 Emily Largent PhD University of Pennsylvania  
 Kristin Harkins MPH University of Pennsylvania

#### **Early Project Development**

Michael W. Weiner, MD UCSF/NCIRE  
 Leon Thal, MD – Past Investigator  
 Zaven Kachaturian, PhD Khachaturian, Radebaugh & Associates (KRA), Inc  
 Richard Frank, MD, PhD General Electric

Peter J. Snyder, PhD                                  University of Connecticut  
 Alzheimer's Association's Ronald and Nancy Reagan's Research Institute

**NIA**

Neil Buckholtz, PhD                                  National Institute on Aging  
 John K. Hsiao, MD                                    National Institute on Aging  
 Laurie Ryan, PhD                                    National Institute on Aging  
 Susan Molchan, PhD                                National Institute on Aging/National Institutes of Health

**ADNI External Scientific Advisory Board (SAB)**

Zaven Khachaturian, PhD                        Prevent Alzheimer's Disease 2020 (Chair)  
 Maria Carrillo, PhD                                Alzheimer's Association  
 William Potter, MD                                National Institute of Mental Health  
 Lisa Barnes, PhD                                    Rush University  
 Marie Bernard, MD                                NIA  
 Hector González                                    University of California, San Diego  
 Carole Ho                                            Denali Therapeutics  
 John K. Hsiao, MD                                NIH  
 Jonathan Jackson, PhD                          Massachusetts General Hospital  
 Eliezer Masliah, MD                              NIA  
 Donna Masterman, MD                          Biogen  
 Ozioma Okonkwo, PhD                        University of Wisconsin, Madison  
 Richard Perrin, MD, PhD                        Washington University St. Louis  
 Laurie Ryan, PhD                                NIA  
 Nina Silverberg, PhD                              NIA

**Part B: Investigators By Site**

**Oregon Health and Science University:**

Lisa Silbert, MD  
 Jeffrey Kaye, MD  
 Sylvia White (Salazar), ND  
 Aimee Pierce, MD  
 Amy Thomas, BSN, RN  
 Tera Clay  
 Daniel Schwartz, BA  
 Gillian Devereux, RN, MPH  
 Janet "Janae" Taylor  
 Jennifer Ryan, ND, MS  
 Mike Nguyen  
 Madison DeCapo, BS  
 Yanan Shang, MD

**University of Southern California:**

Lon Schneider, MD  
Cynthia Munoz, MA  
Diana Ferman, PA  
Carlota Conant, BS  
Katherin Martin  
Kristin Oleary  
Sonia Pawluczyk, MD  
Elizabeth Trejo  
Karen Dagerman  
Liberty Teodoro, RN  
Mauricio Becerra  
Madiha Fairouz, BS  
Sonia Garrison, MSsc  
Julia Boudreau, MS  
Yair Avila, BA

**University of California--San Diego:**

James Brewer, MD, PhD  
Aaron Jacobson  
Antonio Gama  
Chi Kim  
Emily Little, MPH  
Jennifer Frascino  
Nichol Ferng  
Socorro Trujillo, MPH

**University of Michigan:**

Judith Heidebrink, MD  
Robert Koeppe, PhD  
Steven MacDonald, MD  
Dariya Malyarenko, Ph.D.  
Jaimie Ziolkowski, MA, BS, TLLP  
James O'Connor, MS, RT (R)(MR)  
Nicole Robert  
Suzan Lowe  
Virginia Rogers

**Mayo Clinic, Rochester:**

Ronald Petersen, MD, Ph.D.  
Barbara Hackenmiller  
Bradley Boeve, MD  
Colleen Albers, RN

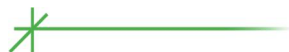



Connie Kreuger  
David Jones, MD  
David Knopman, MD  
Hugo Botha, MB, Ch.B.  
Jessica Magnuson  
Jonathan Graff-Radford, MD  
Kerry Crawley, BSW, CCRP  
Michael Schumacher, CNMT  
Sanna McKinzie, MS  
Steven Smith, MS  
Tascha Helland, BS  
Val Lowe, MD  
Vijay Ramanan, MD, PhD

**Baylor College of Medicine:**

Valory Pavlik, PhD  
Jacob Faircloth, BS  
Jeffrey Bishop, PA  
Jessica Nath  
Maria Chaudhary, MAP  
Maria Katakis, PhD, MD  
Melissa Yu, MD, FAAN  
Nathiel Pacini, MA  
Randall Barker  
Regan Brooks, BA  
Ruchi Aggarwal, MD

**Columbia University Medical Center:**

Lawrence Honig, MD, Ph.D.  
Yaakov Stern, PhD  
Akiva Mintz, MD  
Jonathan Cordona, ARRT  
Michelle Hernandez

**Washington University, St. Louis:**

Justin Long, MD  
Abbey Arnold, NP  
Alex Groves  
Anna Middleton, RN  
Blake Vogler  
Cierra McCurry  
Connie Mayo, RN  
Cyrus Raji, MD, PhD



Fatima S. Amtashar, BS  
Heather Klemp, MSW  
Heather Nicole Elmore, RN, MSN, ANP-BC, CCRP  
James Ruszkiewicz, CNMT  
Jasmina Kusuran  
Jasmine Stewart  
Jennifer Horenkamp, RN, BSN  
Julia Greeson, MS  
Kara Wever, MA  
Katie Vo, MD  
Kelly Larkin, RN  
Lesley Rao, MD  
Lisa Schoolcraft, BFA  
Lora Gallagher  
Madeline Paczynski, BS, PA-C  
Maureen McMillan  
Michael Holt, MSW  
Nicole Gagliano, BS, RT  
Rachel Henson, MS  
Renee LaBarge  
Robert Swarm, MD  
Sarah Munie, BSN, RN  
Serena Cepeda, BS  
Stacey Winterton, BSN, RN  
Stephen Hegedus  
TaNisha Wilson  
Tanya Harte, FNP-BC  
Zach Bonacorsi

**University of Alabama Birmingham:**

David Geldmacher, MD  
Amber Watkins, RN  
Brandi Barger, BSRT  
Bryan Smelser, MD  
Charna Bates, MA  
Cynthia Stover, PENDING  
Emily McKinley,  
Gregory Ikner, MA  
Haley Hendrix,  
Harold Matthew Cooper, MSN, CRNP, NPC  
Jennifer Mahaffey,  
Lindsey Booth Robbins, MSN, CRNP, PNP-C  
Loren Brown Ashley, RN, BSN  
Marissa Natelson-Love, MD



Princess Carter, RN  
Veronika Solomon,

**Mount Sinai School of Medicine:**

Hillel Grossman, MD  
Alexandra Groome, BA  
Allison Ardolino, MA  
Anthony Kaplan, ARRT, CNMT  
Faye Sheppard, BS  
Genesis Burgos-Rivera, BA  
Gina Garcia-Camilo, MD  
Joanne Lim, MA  
Judith Neugroschl, MD  
Kimberly Jackson, BS  
Kirsten Evans, BS  
Laili Soleimani, MD  
Mary Sano, Ph.D.  
Nasrin Ghesani, MD  
Sarah Binder, BS  
Xiomara Mendoza Apuango, BS

**Rush University Medical Center:**

Ajay Sood, MD, PhD  
Amelia Troutman, MA  
Kimberly Blanchard, APRN, DNP, NP-C  
Arlene Richards,  
Grace Nelson, BA  
Kirsten Hendrickson, RN, MSN  
Erin Yurko,  
Jamie Plenge, BS  
Victoria Rufo, MS  
Raj Shah, MD

**Wein Center:**

Ranjan Duara, MD  
Brendan Lynch, CRT  
Cesar Chirinos, PsyD  
Christine Dittrich, CRT  
Debbie Campbell  
Diego Mejia, CRT  
Gilberto Perez, CRT  
Helena Colvee, BS  
Joanna Gonzalez, PsyD  
Josalen Gondrez, MS  
Joshua Knaack



Mara Acevedo  
Maria Cereijo, APRN  
Maria Greig-Custo, MD  
Michelle Villar, BS  
Morris Wishnia  
Sheryl Detling  
Warren Barker, MS

**Johns Hopkins University:**

Marilyn Albert, Ph.D.  
Abhay Moghekar  
Barbara Rodzon  
Corey Demsky  
Gregory Pontone, MD  
Jim Pekar  
Leonie Farrington, CNRN  
Martin Pomper  
Nicole Johnson  
Tolulope Alo

**New York University:**

Martin Sadowski, MD, PhD  
Anasztasia Ulysse, BA  
Arjun Masurkar  
Brittany Marti  
David Mossa, R.T  
Emilie Geesey  
Emily Petrocca, NP  
Evan Schulze, PhD  
Jennifer Wong  
Joseph Boonsiri  
Sunnie Kenowsky, DVM  
Tatianne Martinez, NP  
Veronica Briglall

**Duke University Medical Center:**

P. Murali Doraiswamy, MD, MBBS  
Adaora Nwosu  
Alisa Adhikari, BS  
Cammie Hellegers, MA  
Jeffrey Petrella  
Olga James, MD  
Terence Wong  
Thomas Hawk



**University of Pennsylvania:**

Sanjeev Vaishnavi, MD, PhD  
Hannah McCoubrey, BA  
Ilya Nasrallah, MD, PhD  
Rachel Rovere, BA  
Jeffrey Maneval, MD  
Elizabeth Robinson, MA  
Francisco Rivera, MS  
Jade Uffelman, BS  
Martha Combs, BS, MS  
Patricia O'Donnell  
Sara Manning, MD

**University of Kentucky:**

Richard King, MD  
Alayne Nieto, BSN, RN  
Amanda Glueck, PhD  
Anjana Mandal  
Audrie Swain  
Bethanie Gamble, PhD, RN  
Beverly Meacham, RT(R) (MR)  
Denece Forenback, RN  
Dorothy Ross, CCRP  
Elizabeth Cheatham  
Ellen Hartman  
Gary Cornell  
Jordan Harp, PhD  
Laura Ashe  
Laura Goins  
Linda Watts, RN  
Morgan Yazell  
Prabin Mandal  
Regan Buckler, BSN, RN  
Sylvia Vincent  
Triana Rudd

**University of Pittsburgh:**

Oscar Lopez, MD  
Ann Arlene Malia  
Caitlin Chiado, CRNP  
Cary Zik  
James Ruszkiewicz, CNMT  
Kathleen Savage  
Linda Fenice  
MaryAnn Oakley, MA



Paige C Tacey, M.Ed.  
Sarah Berman, MD, PhD  
Sarah Bowser, CRNP  
Stephen Hegedus  
Xanthia Saganis

**University of Rochester Medical Center:**

Anton Porsteinsson, MD  
Abigail Mathewson, RN, BSN  
Asa Widman, BA  
Bridget Holvey, BS  
Emily Clark, DO  
Esmeralda Morales, MS  
Iris Young, PA-C  
James Ruskiewicz, CNMT  
Kevin Hopkins, BS, CNMT, LNMT  
Kimberly Martin, RN, BSN  
Nancy Kowalski, RN, MS  
Rebecca Hunt, BS  
Roberta Calzavara, PhD  
Russell Kurvach, BS, CCRP  
Stephen D'Ambrosio, PA-C, MPAS

**University of California, Irvine:**

Gaby Thai, MD  
Beatriz Vides, RN, MSN  
Brigit Lieb, ARRT/CRT  
Catherine McAdams-Ortiz, MSN, RN, A/GNP  
Cyndy Toso  
Ivan Mares, BS  
Kathryn Moorlach  
Luter Liu  
Maria Corona, PhD  
Mary Nguyen, BA  
Melanie Tallakson, DNP, FNP-C  
Michelle McDonnell, PhD  
Milagros Rangel, BS  
Neetha Basheer, MD, MBBS  
Patricia Place, BA  
Romina Romero, PhD  
Steven Tam, MD

**University of Texas Southwestern Medical School:**

Trung Nguyen, MD, PhD



Abey Thomas, ARRT  
Alexander (Alex) Frolov, MD  
Alka Khera, MD  
Amy Browning, BA (Pending)  
Brendan Kelley (031), MD  
Courtney Dawson, RT(R)  
Dana Mathews, MD, Ph.D.  
Elaine Most, MS (Pending)  
Elizeva (Ellie) Phillips, CNMT  
Lynn Nguyen  
Maribel Nunez  
Matalin Miller, MS  
Matthew R. Jones, MA  
Natalie Martinez, MSN, RN, FNP-BC  
Rebecca Logan, PA-C  
Roderick McColl  
Sari Pham  
Tiffani Fox, MBA, MS  
Tracey Moore, BA

**Emory University:**

Allan Levey, MD, PhD  
Abby Brown, NP  
Andrea Kippels, NP  
Ashton Ellison, BSPH, ABA  
Casie Lyons  
Chadwick Hales, MD, PhD  
Cindy Parry, BFA  
Courtney Williams  
Elizabeth McCorkle, BS  
Guy Harris, BA  
Heather Rose, BSN  
Inara Jooma, BS  
Jahmila Al-Amin, MS, BS  
James Lah, MD, PhD  
James Webster, BS  
Jessica Swiniarski, MPH, BS  
Latasha Chapman, BS  
Laura Donnelly, MPH  
Lauren Mariotti  
Mary Locke, BS  
Phyllis Vaughn, BSN  
Rachael Penn, BSN, RN  
Sallie Carpentier, RN, BSN



Samira Yeboah, BMSc, R.T.(R) (MR)  
Sarah Basadre, BMSc, ARRT(R)(MR)  
Sarah Malakauskas, MS  
Stefka Lyron, NP  
Tara Villinger, NP  
Terra Burney

**University of Kansas, Medical Center:**

Jeffrey Burns, MD, MS  
Ala Abusalim, PA-C  
Alexandra Dahlgren, BS  
Alexandria Montero, RN  
Anne Arthur, BSN, MS, ANP-BC  
Heather Dooly, BS  
Katelynn Kreszyn, APRN  
Katherine Berner, BS  
Lindsey Gillen, APRN  
Maria Scanlan, BA  
Mercedes Madison, BS  
Nicole Mathis  
Phyllis Switzer  
Ryan Townley, MD  
Samantha Fikru, APRN, MSN, FNP-C  
Samantha Sullivan, MSW  
Ella Wright, BS

**University of California, Los Angeles:**

Maryam Beigi, MD  
Anthony Daley  
Ashley Ko  
Brittney Luong  
Glen Nyborg  
Jessica Morales  
Kelly Durbin, PhD  
Lauren Garcia  
Leila Parand  
Lorena Macias  
Lorena Monserratt, PhD  
Maya Farchi  
Pauline Wu, DO  
Robert Hernandez  
Thao Rodriguez, NP

**Mayo Clinic, Jacksonville:**

Neill Graff-Radford, MD, MBBCH, FRCP





A'llana Marolt, BS  
Anton Thomas, BS  
Deborah Aloszka  
Ercilia Moncayo, BS  
Erin Westerhold, RT  
Gregory Day, MD  
Kandise Chrestensen, BS  
Mary Imhansiemhonehi, BS  
Sanna McKinzie, MS  
Sochenda Stephens, CCRP  
Sylvia Grant, CCRC

**Indiana University:**

Jared Brosch, MD  
Amy Perkins, CCRP  
Aubree Saunders, BS  
Debra Silberberg Kovac, BS  
Heather Polson, CNMT  
Isabell Mwaura, BS  
Kassandra Mejia, BS  
Katherine Britt, BS  
Kathy King, RN  
Kayla Nichols, BS  
Kayley Lawrence, BA  
Lisa Rankin, BSW  
Martin Farlow, MD  
Patricia Wiesenauer, MS  
Robert Bryant, BS  
Scott Herring, RN  
Sheryl Lynch, RN  
Skylar Wilson  
Traci Day  
William Korst

**Yale University School of Medicine:**

Christopher van Dyck, MD  
Adam Mecca, MD, PhD  
Alyssa Miller, BS  
Amanda Brennan, LMSE, MSW  
Amber Khan, MD  
Audrey Ruan  
Carol Gunnoud, AS  
Chelsea Mendonca, MD  
Danielle Raynes-Goldfinger, BS  
Elaheh Salardini, MD

Elisa Hidalgo, MS, CNMT, EMT, RT (CT)  
Emma Cooper, BA  
Erawadi Singh, DO  
Erin Murphy, BS  
Jeanine May, APRN, MSN, MHP, CCRP  
Jesse Stanhope, BS  
Jessica Lam, BSE  
Julia Waszak, BS  
Kimberly Nelsen, BA  
Kimberly Sacaza, BS  
Mayer Joshua Hasbani, MD  
Meghan Donahue, BA  
Ming-Kai Chen, MD, PhD  
Nicole Barcelos, MS, MA  
Paul Eigenberger, MD  
Robin Bonomi, MD  
Ryan O'Dell, MD, PhD  
Sarah Jefferson, MD  
Siddharth Khasnavis, MD  
Stephen Smilowitz, MD  
Susan DeStefano, APRN, MSN  
Susan Good, APRN  
Terry Camarro, RT, RN, MRI, APRT  
Vanessa Clayton, BS  
Yanis Cavrel, BA  
YuQuan "Oliver" Lu

**McGill University, Montreal-Jewish General Hospital:**

Howard Chertkow, MD  
Howard Bergman, MD  
Chris Hosein, M.Ed

**Sunnybrook Health Sciences, Ontario:**

Sandra Black, MD  
Anish Kapadia, MD  
Aparna Bhan  
Benjamin Lam, MD, FRCP(c)  
Christopher Scott, BSc  
Gillian Gabriel, MA  
Jennifer Bray, BA, BSW, MSW  
Ljubica Zotovic, MD  
Maria Samira Gutierrez  
Mario Masellis  
Marjan Farshadi, MD  
Maurylette Gui, Psych BSc



Meghan Mitchell, BSc  
Rebecca Taylor  
Ruby Endre, M.R.T  
Zhala Taghi-Zada

**University of British Columbia Clinic for AD & Related Disorders**

Robin Hsiung, MD  
Carolyn English  
Ellen Kim, BA  
Eugene Yau  
Haley Tong  
Laura Barlow, RTR/RTMR  
Lauren Jennings  
Michele Assaly  
Paula Nunes, PhD  
Tahlee Marian

**Cognitive Neurology St. Joseph's Ontario:**

Andrew Kertesz, MD  
John Rogers, MD  
Dick Trost, PhD

**Cleveland Clinic Lou Ruvo Center for Brain Health**

Dylan Wint, MD  
Charles Bernick, MD  
Donna Munic, PhD

**Northwestern University:**

Ian Grant, MD  
Aaliyah Korkoyah, BS  
Ali Raja  
Allison Lapins, MD  
Caila Ryan, MS  
Jelena Pejic  
Kailey Basham, BS  
Leena Lukose, BS  
Loreece Haddad, MS  
Lucas Quinlan, BS, MLS (ASCP)  
Nathaniel Houghtaling

**Premiere Research Inst (Palm Beach Neurology):**

Carl Sadowsky MD  
Walter Martinez MD  
Teresa Villena MD



**Georgetown University Medical Center:**

Brigid Reynolds, NP  
Angelica Forero, MS  
Carolyn Ward, MSPH  
Emma Brennan, BS  
Esteban Figueroa  
Giuseppe Esposito, MD  
Jessica Mallory  
Kathleen Johnson, RN, NP  
Kathryn Turner, BSN  
Katie Seidenberg  
Kelly McCann, BA  
Margaret Bassett, NP  
Melanie Chadwick, NP  
Raymond Scott Turner, MD, PhD  
Robin Bean, RT  
Saurabh Sharma, MD

**Brigham and Women's Hospital:**

Gad Marshall, MD  
Aferdita Haviari, BA  
Alison Pietras, PA-C, ACP  
Bradley Wallace, BS  
Catherine Munro, PhD  
Gladiliz Rivera-Delpin, MA  
Hadley Hustead, BS  
Isabella Levesque  
Jennifer Ramirez, BA  
Karen Nolan, BS, RT (MR)  
Kirsten Glennon, RN, CNRN  
Mariana Palou, BA  
Michael Erkinen, MD  
Nicole DaSilva  
Pamela Friedman, Psy. D  
Regina M. Silver, RN  
Ricardo Salazar, MD  
Roxanne Polleys, AA  
Scott McGinnis (094), MD  
Seth Gale, MD  
Tia Hall, BS  
Tuan Luu

**Stanford University:**

Steven Chao, MD



Emmeline Lin, BS  
Jaila Coleman, BA  
Kevin Epperson, RT(R)(MR)  
Minal Vasanawala

**Banner Sun Health Research Institute**

Alireza Atri, MD, PhD  
Amy Rangel  
Brittani Evans  
Candy Monarrez  
Carol Cline, LMSW  
Carolyn Liebsack, RN, BSN, CCRC  
Daniel Bandy  
Danielle Goldfarb, MD  
Debbie Intorcia  
Jennifer Olgin  
Kelly Clark  
Kelsey King, CCRP  
Kylee York  
Marina Reade, RN, FNP-C  
Michael Callan  
Michael Glass  
Michaela Johnson, G-ACNP, BC  
Michele Gutierrez  
Molly Goddard  
Nadira Trncic, MD, PhD  
Parichita Choudhury, MD  
Priscilla Reyes  
Serena Lowery  
Shaundra Hall  
Sonia Olgin  
Stephanie de Santiago, RN, NP

**Boston University:**

Michael Alosco, PhD  
Alyssa Ton, BS  
Amanda Jimenez, MS, EMT-B, CPT  
Andrew Ellison, MR Technologist  
Anh Tran, RN  
Brandon Anderson, RT(N), CNMT  
Della Carter, MS  
Donna Veronelli, RTN, CNMT  
Steven Lenio, MD  
Eric Steinberg, RN, MSN, CNP  
Jesse Mez, MD, MS



Jason Weller, MD  
Jennifer Johns, RN  
Jesse Mez, MD, MS  
Jessica Harkins, CNMT  
Alexa Puleio, MS  
Ina Hoti, BS  
Jane Mwicigi, MBChB., MPH  
Alexa Puleio, MS  
Michael Alosco, PhD  
Olivia Schultz, BA  
Mona Lauture, RN  
Eric Steinberg  
Ridiane Denis, RN  
Ronald Killiany, PhD  
Sarab Singh, CNMT  
Steven Lenio, MD  
Wendy Qiu, MD, PhD  
Ycar Devis, MPH

**Howard University:**

Thomas Obisesan, MD, MPH  
Andrew Stone, MS  
Debra Ordor, RN, BSN  
Ifreke Udodong, CRNP  
Immaculata Okonkwo, DNP, MSN, APRN, FNP-BC  
Javed Khan, MD  
Jillian Turner, BS, MS  
Kyliah Hughes, BS, RMA  
Oshoze Kadiri, MPH

**Case Western Reserve University:**

Charles Duffy, MD, PhD  
Ariana Moss  
Katherine Stapleton, LPN  
Maria Toth (fmr Gross), RN  
Marianne Sanders, BSN, RN  
Martin Ayres  
Melissa Hamski  
Parianne Fatica, CCRC  
Paula Ogrocki, PhD  
Sarah Ash  
Stacy Pot

**University of California, Davis Sacramento :**

Doris Chen, MD



Andres Soto  
Costin Tanase, PhD  
David Bissig, MD, PhD  
Hafsanoor Vanya, BA  
Heather Russell (116), CNMT  
Hitesh Patel, CNMT  
Hongzheng Zhang, CCRP  
Kelly Wallace, CCRP  
Kristi Ayers, BS  
Maria Gallegos, BS  
Martha Forloines, PhD  
Meghan Sinn  
Queennie Majorie S Kahulugan, CCRC  
Richard Isip, RT (R)(N)(CT)  
Sandra Calderon, MS, RN, FMP-C  
Talia Hamm, BA, CCRP

**Parkwood Hospital:**

Michael Borrie, MD  
T-Y Lee, PhD  
Dr Rob Bartha, PhD

**University of Wisconsin:**

Sterling Johnson, PhD  
Sanjay Asthana, MD  
Cynthia M. Carlsson, MD

**Banner Alzheimer's Institute:**

Allison Perrin, MD  
Pierre Tariot, MD  
Adam Fleisher, MD  
Stephanie Reeder, BA

**Dent Neurologic Institute**

Horacio Capote, MD  
Allison Emborsky  
Anna Mattle, PharmD, MS  
Bela Ajtai, MD  
Benjamin Wagner, PA-C  
Bennett Myers  
Daryn Slazyk  
Delaney Fragale, PA-C  
Erin Fransen, PA  
Heather Macnamara  
Jonathan Falletta, PA-C



Joseph Hirtreiter, RN  
Laszlo Mechtler, MD  
Megan King  
Michael Asbach, RPA-C  
Michelle Rainka, Pharm. D., CCRP  
Richard Zawislak, NP  
Scott Wisniewski  
Stephanie O'Malley, PA-C  
Tatiana Jimenez-Knight  
Todd Peehler  
Traci Aladeen, PharmD  
Vernice Bates  
Violet Wenner  
Wisam Elmalik, MD

**Ohio State University:**

Douglas W. Scharre, MD  
Arun Ramamurthy, MD  
Soumya Bouchachi, MD  
Maria Kataki, MD, PhD - Past Investigator  
Rawan Tarawneh, MD - Past Investigator  
Brendan Kelley, MD - Past Investigator

**Albany Medical College:**

Dzintra Celmins, MD  
Alicia Leader  
Chris Figueroa  
Heather Bauerle, NP  
Katlynn Patterson  
Michael Reposo  
Steven Presto  
Tuba Ahmed  
Wendy Stewart

**Hartford Hosp, Olin Neuropsychiatry Research Center:**

Godfrey D. Pearlson MD  
Karen Blank, MD  
Karen Anderson, RN

**Dartmouth-Hitchcock Medical Center:**

Robert B. Santulli, MD  
Eben S. Schwartz, PhD

**Wake Forest University Health Sciences:**

Jeff Williamson, MD, MHS, FACP





Alicia Jessup, RN  
Andrea Williams  
Crystal Duncan  
Abigail O'Connell, APRN, FNP-C  
Karen Gagnon  
Ezequiel Zamora  
James Bateman  
Freda Crawford, CNMT  
Deb Thompson  
Eboni Walker  
Jennifer Rowell  
Mikell White, MHA  
Phillip "Hunter" Ledford  
Sarah Bohlman, MSL  
Susan Henkle, RN  
Joseph Bottoms, CNMT  
Lena Moretz, RT(R) CT (MR)  
Bevan Hoover, BS  
Michael Shannon  
Samantha Rogers, PA-C  
Wendy Baker  
William Harrison, MD

**Rhode Island Hospital:**

Chuang-Kuo Wu, MD  
Alexis DeMarco, BS  
Ava Stipanovich, BS, ScM  
Daniel Arcuri, CNMT, RT(N)(CT)  
Jan Clark, RN, BSN, CCRC, CSNT  
Jennifer Davis, PhD  
Kerstin Doyon, RN, BSN  
Marie Amoyaw, BA  
Mauro Veras Acosta, PENDING, BS  
Ronald Bailey, RT-R, CNMT  
Scott Warren, MD  
Terry Fogerty  
Victoria Sanborn, PhD

**Butler Hospital**

Meghan Riddle, MD  
Stephen Salloway, MD, MS  
Paul Malloy, PhD  
Stephen Correia, PhD



**University of California San Francisco**

Charles Windon, MD  
Morgan Blackburn  
Howard J. Rosen, MD  
Bruce L. Miller, MD

**University of South Florida, Byrd Institute**

Amanda Smith, MD  
Ijeoma Mba, MBA, MPH  
Jenny Echevarria  
Juris Janavs

**University of Chicago**

Emily Roglaski, PhD  
Meagan Yong  
Rebecca Devine

**Eastern Virginia Medical School**

Hamid Okhravi, MD

**Charter Health Research Services**

Edgardo Rivera, MD  
Teresa Kalowsky  
Caroline Smith  
Christina Rosario

**Houston Methodist Neurological Institute**

Joseph Masdeu, MD, PhD  
Richard Le, PharmD  
Maushami Gurung

**Barrow Neurological Institute**

Marwan Sabbagh, MD  
Angelica Garcia  
Micah Ellis Slaughter  
Nadeen Elayan  
Skieff Acothley

**Nathan Kline Institute**

Nunzio Pomara, MD  
Raymundo Hernando  
Vita Pomara  
Chelsea Reichert



**Ralph Johnson Veterans Administration Health Care Services**

Olga Brawman-Mintzer, MD

Allison Acree

Arthur Williams

Campbell Long

Rebecca Long

**Vanderbilt University Medical Center**

Paul Newhouse, MD

Sydni Jeneé Hill

Amy Boegel

**University of Texas Health, San Antonio**

Sudha Seshadri, MD

Amy Saklad

Floyd Jones

**Rutgers University**

William Hu, MD, PhD

V. Sotelo

**Gonzalez & Aswad Health Services**

Yaneicy Gonazalez Rojas, MD

**Medical University South Carolina**

Jacobo Mintzer, MD, MBA

Crystal Flynn Longmire, PhD

Kenneth Spicer, MD, PhD
